# Supplementary material for: Perceptions of older adults in Ontario, Canada on the implementation and impact of a primary care programme, Health Teams Advancing Patient Experience: Strengthening Quality (Health TAPESTRY): a descriptive qualitative study
Source: PubMed Central journal article supplement — BMJ Open. 2019 Jun 14;9(6):e026257. doi: 10.1136/bmjopen-2018-026257 (PMC6575818; doi:10.1136/bmjopen-2018-026257), 2019-06-14
Supplement: bmjopen-2018-026257.draft_revisions.pdf [file bmjopen-2018-026257.draft_revisions.pdf]

# BMJ Open

BMJ Open is committed to open peer review. As part of this commitment we make the peer review history of every article we publish publicly available.

When an article is published we post the peer reviewers' comments and the authors' responses online. We also post the versions of the paper that were used during peer review. These are the versions that the peer review comments apply to.

The versions of the paper that follow are the versions that were submitted during the peer review process. They are not the versions of record or the final published versions. They should not be cited or distributed as the published version of this manuscript.

BMJ Open is an open access journal and the full, final, typeset and author-corrected version of record of the manuscript is available on our site with no access controls, subscription charges or pay-per-view fees (<http://bmjopen.bmj.com>).

If you have any questions on BMJ Open's open peer review process please email [info.bmjopen@bmj.com](mailto:info.bmjopen@bmj.com)

# BMJ Open

## Perceptions of Older Adults on the Implementation and Impact of a Primary Care Program, Health Teams Advancing Patient Experience: Strengthening Quality (Health TAPESTRY)

|                               |                                                                                                                                                                                                                                                                                                                                                                                                                                                                                                                                                                                                                                                                                                                                                                                                                                                                                                                                                                  |
|-------------------------------|------------------------------------------------------------------------------------------------------------------------------------------------------------------------------------------------------------------------------------------------------------------------------------------------------------------------------------------------------------------------------------------------------------------------------------------------------------------------------------------------------------------------------------------------------------------------------------------------------------------------------------------------------------------------------------------------------------------------------------------------------------------------------------------------------------------------------------------------------------------------------------------------------------------------------------------------------------------|
| Journal:                      | <i>BMJ Open</i>                                                                                                                                                                                                                                                                                                                                                                                                                                                                                                                                                                                                                                                                                                                                                                                                                                                                                                                                                  |
| Manuscript ID                 | bmjopen-2018-026257                                                                                                                                                                                                                                                                                                                                                                                                                                                                                                                                                                                                                                                                                                                                                                                                                                                                                                                                              |
| Article Type:                 | Research                                                                                                                                                                                                                                                                                                                                                                                                                                                                                                                                                                                                                                                                                                                                                                                                                                                                                                                                                         |
| Date Submitted by the Author: | 23-Aug-2018                                                                                                                                                                                                                                                                                                                                                                                                                                                                                                                                                                                                                                                                                                                                                                                                                                                                                                                                                      |
| Complete List of Authors:     | <p>Ploeg, Jenny ; McMaster University, School of Nursing<br/> Valaitis, Ruta; McMaster University School of Nursing<br/> Cleghorn, Laura; McMaster University, Family Medicine; McMaster University<br/> Yous, Marie-Lee; McMaster University School of Nursing,<br/> Gaber, Jessica; McMaster University Faculty of Health Sciences, Family Medicine<br/> Agarwal, Gina; McMaster University Department of Family Medicine<br/> Kastner, Monika; North York General Hospital, Research and Innovation;<br/> University of Toronto, Institute of Health Policy, Management and Evaluation<br/> Mangin, Dee; McMaster University, Family Medicine<br/> Oliver, Doug; McMaster University Department of Family Medicine<br/> Parascandalo, Fiona; McMaster University Department of Family Medicine<br/> Risdon, Cathy ; McMaster University, Family Medicine<br/> Dolovich, Lisa; McMaster University/McMaster Innovation Park, Department of Family Medicine</p> |
| Keywords:                     | OLDER ADULTS, PRIMARY CARE, INTERPROFESSIONAL TEAMS, GOAL-SETTING, QUALITATIVE RESEARCH                                                                                                                                                                                                                                                                                                                                                                                                                                                                                                                                                                                                                                                                                                                                                                                                                                                                          |
|                               |                                                                                                                                                                                                                                                                                                                                                                                                                                                                                                                                                                                                                                                                                                                                                                                                                                                                                                                                                                  |

SCHOLARONE™  
Manuscripts

1  
2  
3  
4  
5 Research Article  
6  
7

8 **Title:** Perceptions of Older Adults on the Implementation and Impact of a Primary Care  
9 Program, Health Teams Advancing Patient Experience: Strengthening Quality (Health  
10 TAPESTRY)  
11

12  
13  
14 **Running Title:** Perceptions of Older Adults of Health TAPESTRY  
15

16  
17 \* Jenny Ploeg, RN, PhD, Professor, School of Nursing, Scientific Director, Aging, Community  
18 and Health Research Unit, Faculty of Health Sciences and Associate Member, Department of  
19 Health, Aging and Society, McMaster University; 1280 Main Street West, Hamilton, ON L8S  
20 4K1, Canada; phone: 905-525-9140 ext 22294; email: [ploegj@mcmaster.ca](mailto:ploegj@mcmaster.ca) \*Corresponding  
21 author  
22

23  
24  
25 Ruta Valaitis, RN, PhD, Professor, School of Nursing, Scientific Director, Aging, Community  
26 and Health Research Unit, Faculty of Health Sciences and Associate Member, Department of  
27 Health, Aging and Society, McMaster University; 1280 Main Street West, Hamilton, ON L8S  
28 4K1, Canada. Email: [valaitis@mcmaster.ca](mailto:valaitis@mcmaster.ca)  
29

30  
31  
32 Laura Cleghorn, MA, Research Operations Coordinator, Department of Family Medicine,  
33 McMaster University, David Braley Health Sciences Centre, 100 Main Street West, 5<sup>th</sup> floor,  
34 Hamilton, ON L8P 1H6. Email: [cleghol@mcmaster.ca](mailto:cleghol@mcmaster.ca)  
35

36  
37  
38 Marie-Lee Yous RN, BScN, MScN student, School of Nursing, McMaster University, 1280  
39 Main Street West, Hamilton, ON L8S 4K1, Canada. Email: [yousm@mcmaster.ca](mailto:yousm@mcmaster.ca)  
40

41  
42  
43 Jessica Gaber, MSW, RSW, Research Coordinator, Department of Family Medicine, McMaster  
44 University, David Braley Health Sciences Centre, 100 Main Street West, 5<sup>th</sup> floor, Hamilton, ON  
45 L8P 1H6. Email: [jgaber@mcmaster.ca](mailto:jgaber@mcmaster.ca)  
46

47  
48  
49 Gina Agarwal, MBBS, PhD, MRCGP, CCFP, FCFP, DFFP, Associate Professor, Department of  
50 Family Medicine, McMaster University, David Braley Health Sciences Centre, 100 Main Street  
51 West, 5<sup>th</sup> floor, Hamilton, ON L8P 1H6. Email: [agarg@mcmaster.ca](mailto:agarg@mcmaster.ca)  
52

53  
54  
55  
56  
57  
58  
59  
60  
61  
62  
63  
64  
65  
66  
67  
68  
69  
70  
71  
72  
73  
74  
75  
76  
77  
78  
79  
80  
81  
82  
83  
84  
85  
86  
87  
88  
89  
90  
91  
92  
93  
94  
95  
96  
97  
98  
99  
100  
101  
102  
103  
104  
105  
106  
107  
108  
109  
110  
111  
112  
113  
114  
115  
116  
117  
118  
119  
120  
121  
122  
123  
124  
125  
126  
127  
128  
129  
130  
131  
132  
133  
134  
135  
136  
137  
138  
139  
140  
141  
142  
143  
144  
145  
146  
147  
148  
149  
150  
151  
152  
153  
154  
155  
156  
157  
158  
159  
160  
161  
162  
163  
164  
165  
166  
167  
168  
169  
170  
171  
172  
173  
174  
175  
176  
177  
178  
179  
180  
181  
182  
183  
184  
185  
186  
187  
188  
189  
190  
191  
192  
193  
194  
195  
196  
197  
198  
199  
200  
201  
202  
203  
204  
205  
206  
207  
208  
209  
210  
211  
212  
213  
214  
215  
216  
217  
218  
219  
220  
221  
222  
223  
224  
225  
226  
227  
228  
229  
230  
231  
232  
233  
234  
235  
236  
237  
238  
239  
240  
241  
242  
243  
244  
245  
246  
247  
248  
249  
250  
251  
252  
253  
254  
255  
256  
257  
258  
259  
260  
261  
262  
263  
264  
265  
266  
267  
268  
269  
270  
271  
272  
273  
274  
275  
276  
277  
278  
279  
280  
281  
282  
283  
284  
285  
286  
287  
288  
289  
290  
291  
292  
293  
294  
295  
296  
297  
298  
299  
300  
301  
302  
303  
304  
305  
306  
307  
308  
309  
310  
311  
312  
313  
314  
315  
316  
317  
318  
319  
320  
321  
322  
323  
324  
325  
326  
327  
328  
329  
330  
331  
332  
333  
334  
335  
336  
337  
338  
339  
340  
341  
342  
343  
344  
345  
346  
347  
348  
349  
350  
351  
352  
353  
354  
355  
356  
357  
358  
359  
360  
361  
362  
363  
364  
365  
366  
367  
368  
369  
370  
371  
372  
373  
374  
375  
376  
377  
378  
379  
380  
381  
382  
383  
384  
385  
386  
387  
388  
389  
390  
391  
392  
393  
394  
395  
396  
397  
398  
399  
400  
401  
402  
403  
404  
405  
406  
407  
408  
409  
410  
411  
412  
413  
414  
415  
416  
417  
418  
419  
420  
421  
422  
423  
424  
425  
426  
427  
428  
429  
430  
431  
432  
433  
434  
435  
436  
437  
438  
439  
440  
441  
442  
443  
444  
445  
446  
447  
448  
449  
450  
451  
452  
453  
454  
455  
456  
457  
458  
459  
460  
461  
462  
463  
464  
465  
466  
467  
468  
469  
470  
471  
472  
473  
474  
475  
476  
477  
478  
479  
480  
481  
482  
483  
484  
485  
486  
487  
488  
489  
490  
491  
492  
493  
494  
495  
496  
497  
498  
499  
500  
501  
502  
503  
504  
505  
506  
507  
508  
509  
510  
511  
512  
513  
514  
515  
516  
517  
518  
519  
520  
521  
522  
523  
524  
525  
526  
527  
528  
529  
530  
531  
532  
533  
534  
535  
536  
537  
538  
539  
540  
541  
542  
543  
544  
545  
546  
547  
548  
549  
550  
551  
552  
553  
554  
555  
556  
557  
558  
559  
560  
561  
562  
563  
564  
565  
566  
567  
568  
569  
570  
571  
572  
573  
574  
575  
576  
577  
578  
579  
580  
581  
582  
583  
584  
585  
586  
587  
588  
589  
590  
591  
592  
593  
594  
595  
596  
597  
598  
599  
600  
601  
602  
603  
604  
605  
606  
607  
608  
609  
610  
611  
612  
613  
614  
615  
616  
617  
618  
619  
620  
621  
622  
623  
624  
625  
626  
627  
628  
629  
630  
631  
632  
633  
634  
635  
636  
637  
638  
639  
640  
641  
642  
643  
644  
645  
646  
647  
648  
649  
650  
651  
652  
653  
654  
655  
656  
657  
658  
659  
660  
661  
662  
663  
664  
665  
666  
667  
668  
669  
670  
671  
672  
673  
674  
675  
676  
677  
678  
679  
680  
681  
682  
683  
684  
685  
686  
687  
688  
689  
690  
691  
692  
693  
694  
695  
696  
697  
698  
699  
700  
701  
702  
703  
704  
705  
706  
707  
708  
709  
710  
711  
712  
713  
714  
715  
716  
717  
718  
719  
720  
721  
722  
723  
724  
725  
726  
727  
728  
729  
730  
731  
732  
733  
734  
735  
736  
737  
738  
739  
740  
741  
742  
743  
744  
745  
746  
747  
748  
749  
750  
751  
752  
753  
754  
755  
756  
757  
758  
759  
760  
761  
762  
763  
764  
765  
766  
767  
768  
769  
770  
771  
772  
773  
774  
775  
776  
777  
778  
779  
780  
781  
782  
783  
784  
785  
786  
787  
788  
789  
790  
791  
792  
793  
794  
795  
796  
797  
798  
799  
800  
801  
802  
803  
804  
805  
806  
807  
808  
809  
810  
811  
812  
813  
814  
815  
816  
817  
818  
819  
820  
821  
822  
823  
824  
825  
826  
827  
828  
829  
830  
831  
832  
833  
834  
835  
836  
837  
838  
839  
840  
841  
842  
843  
844  
845  
846  
847  
848  
849  
850  
851  
852  
853  
854  
855  
856  
857  
858  
859  
860  
861  
862  
863  
864  
865  
866  
867  
868  
869  
870  
871  
872  
873  
874  
875  
876  
877  
878  
879  
880  
881  
882  
883  
884  
885  
886  
887  
888  
889  
890  
891  
892  
893  
894  
895  
896  
897  
898  
899  
900  
901  
902  
903  
904  
905  
906  
907  
908  
909  
910  
911  
912  
913  
914  
915  
916  
917  
918  
919  
920  
921  
922  
923  
924  
925  
926  
927  
928  
929  
930  
931  
932  
933  
934  
935  
936  
937  
938  
939  
940  
941  
942  
943  
944  
945  
946  
947  
948  
949  
950  
951  
952  
953  
954  
955  
956  
957  
958  
959  
960  
961  
962  
963  
964  
965  
966  
967  
968  
969  
970  
971  
972  
973  
974  
975  
976  
977  
978  
979  
980  
981  
982  
983  
984  
985  
986  
987  
988  
989  
990  
991  
992  
993  
994  
995  
996  
997  
998  
999  
1000

1  
2  
3 Derelie Mangin, MBChB, DPH, FRNZCGP, Professor, Associate Chair and Director, Research,  
4 Department of Family Medicine, McMaster University, David Braley Health Sciences Centre,  
5 100 Main Street West, 5<sup>th</sup> floor, Hamilton, ON L8P 1H6. Email: mangind@mcmaster.ca  
6  
7

8  
9 Doug Oliver, BSc, MSc, MD, CCFP, Associate Professor, Department of Family Medicine,  
10 McMaster University, David Braley Health Sciences Centre, 100 Main Street West, 5<sup>th</sup> floor,  
11 Hamilton, ON L8P 1H6. Email: dolive@mcmaster.ca  
12  
13

14  
15 Fiona Parascandalo, MA, MSc (candidate), Research Assistant, Department of Family Medicine,  
16 McMaster University, David Braley Health Sciences Centre, 100 Main Street West, 5<sup>th</sup> floor,  
17 Hamilton, ON L8P 1H6. Email: parascf@mcmaster.ca  
18  
19

20  
21 Cathy Risdon, MD, DMan, CCFP, FCFP, Professor and Vice Chair, Director of Health Services,  
22 Department of Family Medicine, McMaster University, David Braley Health Sciences Centre,  
23 100 Main Street West, 5<sup>th</sup> floor, Hamilton, ON L8P 1H6. Email: risdonc@mcmaster.ca  
24  
25

26  
27 Lisa Dolovich, BScPhm, PharmD, MSc, Professor, Department of Family Medicine, McMaster  
28 University, David Braley Health Sciences Centre, 100 Main Street West, 5<sup>th</sup> floor, Hamilton, ON  
29 L8P 1H6. email: ldolovic@mcmaster.ca  
30  
31

32 **Word Count: 4,091**  
33

34 Number of Tables: 5

35 Number of Figures: 0  
36  
37

38 **Keywords: older adults, primary care, interprofessional teams, goal-setting, qualitative**  
39 **research**  
40  
41  
42  
43  
44  
45  
46  
47  
48  
49  
50  
51  
52  
53  
54  
55  
56  
57

## ABSTRACT

**Objectives:** The aim of the study was to explore the perceptions of older adults on the implementation and impact of Health Teams Advancing Patient Experience: Strengthening Quality (Health TAPESTRY), a multi-component primary care program that seeks to improve care coordination for individuals through health-related goal-setting supported by trained lay volunteers who are an extension of an interprofessional team, and the use of technology to support communication among the team.

**Design:** This study used a qualitative descriptive design.

**Setting:** The setting for this study was two primary care practice sites located in a large urban area in Ontario, Canada.

**Participants:** The sample consisted of community-dwelling older adults aged 70 years and older. Participants were recruited from a convenience sample obtained from 360 clients who participated in the 12-month Health TAPESTRY randomized controlled trial.

**Methods:** Semi-structured interviews were conducted with 32 older adults either face-to-face or by telephone. Interviews were transcribed verbatim. Data were analysed using a constant comparative approach to develop themes.

**Results:** Older adults' perceptions about the Health TAPESTRY program included: (a) the lack of a clear purpose and understanding of how information was shared among providers, (b) mixed positive and negative perceptions of goal-setting and provider follow-up after in-home visits by volunteers, (c) positive impacts such as satisfaction with the primary care team, and (d) the potential for the program to be sustained and scaled up to other communities and groups.

**Conclusions:** Older adults living in the community may benefit from greater primary care supports provided through enhanced team-based approaches. Programs such as Health

1  
2  
3 TAPESTRY facilitate opportunities for older adults to work with primary care providers to meet  
4 their self-identified needs. By exploring perceptions of clients, primary care programs can be  
5  
6 further refined and expanded for various populations.  
7  
8

## 9 10 **ARTICLE SUMMARY**

### 11 12 **Strengths and limitations of this study**

- 13  
14 • The study included community-dwelling older adults with a variety of health conditions.
- 15  
16 • A rigorous analytic method was used involving multiple researchers with expertise in  
17  
18 primary care, qualitative, and aging research as well as program evaluation.
- 19  
20 • Study limitations were that most of the participants self-identified as Caucasian and only  
21  
22 English-speaking older adults were interviewed.
- 23  
24 • Only two practice sites from a Family Health Team in one area of Ontario, Canada were  
25  
26 included in this study.  
27  
28  
29  
30  
31  
32  
33  
34  
35  
36  
37  
38  
39  
40  
41  
42  
43  
44  
45  
46  
47  
48  
49  
50  
51  
52  
53  
54  
55  
56  
57  
58  
59  
60

## INTRODUCTION

Since the early 2000's, the province of Ontario in Canada has implemented reforms to improve access to primary care services and chronic disease management, target health promotion and disease prevention, implement interdisciplinary teams, and increase coordination between primary care and other services.<sup>1</sup> Previous studies have explored the impact of interprofessional primary care teams for older adults with complex needs.<sup>2,3</sup> However, few studies describe the experiences and perspectives of clients in relation to innovative primary care models that use this approach.<sup>4</sup>

Efforts to improve the quality of healthcare have increasingly focused on the 'triple aim' of improving individual experience of care, improving population health, and reducing costs.<sup>5</sup> Focusing on clients' experiences provides clear guidance for quality improvement of programs, enhances client safety, improves compliance with treatment plans, and promotes the use of preventative care services.<sup>6,7</sup> It can also provide insight into what is lacking in community programs and how to efficiently use healthcare system resources to better meet clients' needs.<sup>7</sup> Client engagement in program planning and improvement ensures that programs are directly applicable to clients and can maximize the transferability of innovations into clinical practice.<sup>8,9</sup>

There is a positive association between stronger primary care systems and better population health and longevity.<sup>10-13</sup> The core primary care attributes underpinning this effect include first contact care, person-centred-care, continuity, comprehensiveness, and coordination.<sup>14</sup> This evidence is congruent with endeavours to place client-centred, coordinated care at the forefront of efforts to improve primary care.<sup>15</sup> Person-centred care ensures that healthcare consumers are being acknowledged as capable human beings and that their preferences, needs, and values are respected.<sup>16</sup> This paper reports on the experiences of older

1  
2  
3 adults who participated in a new multi-component program designed to improve person-centred,  
4 team-based primary care.  
5  
6

### 7 **Health TAPESTRY**

8  
9  
10 Health Teams Advancing Patient Experience: Strengthening Quality (Health  
11 TAPESTRY) is an innovative primary care program improving care coordination for clients,  
12 centred on their health goals and needs, while optimizing aging.<sup>15</sup> Person-centred approaches  
13 address common issues affecting older adults' health. Multiple components are involved  
14 including in-home visits with trained volunteers, technology-based applications (e.g., TAP-App  
15 and an electronic personal health record (PHR)), increased accessibility and involvement of  
16 interprofessional primary care teams, and integration of community resources.<sup>15</sup>  
17  
18  
19  
20  
21  
22  
23  
24  
25

26 In-home visits were conducted by pairs of volunteers, typically an older individual and a  
27 younger university student. They collected information for the primary care teams using the  
28 'TAP-App' on tablet computers. Information collected about the client's health risks, needs, and  
29 goals was summarized in an electronic report which was transferred to their primary care  
30 electronic medical record.<sup>17</sup> The interdisciplinary team reviewed the report and developed a plan  
31 of care to address identified health risks and goals. Clients were also provided with access to  
32 their PHR so that they could track their own medical information within health modules (e.g.  
33 medication tracker and immunization record) and have increased access to their primary care  
34 team through secure messaging.<sup>17</sup> Common gaps in care were identified from the aggregate  
35 information collected during volunteer home visits. These gaps were addressed for clients during  
36 group education visits known as the Healthy Aging Series offered to clients and their friends and  
37 family.<sup>18</sup> Topics covered included an overview of healthy aging, nutrition, physical activity, and  
38 advance care planning.  
39  
40  
41  
42  
43  
44  
45  
46  
47  
48  
49  
50  
51  
52  
53  
54  
55  
56  
57  
58  
59  
60

1  
2  
3 The aim of the current study was to explore the perceptions of older adults who received  
4 the Health TAPESTRY program in relation to its implementation, impact, and sustainability and  
5 scalability. The research question was: What are the perceptions of older adults who received the  
6 Health TAPESTRY program in relation to: (a) program goals, (b) experiences in the program, (c)  
7 impact, and (d) its sustainability and scalability potential?  
8  
9  
10  
11  
12  
13

## 14 **METHODS**

### 15 **Study design**

16  
17 We report on qualitative findings obtained from older adults who were recruited for a  
18 large, mixed-methods, randomized controlled trial (RCT) that evaluated Health TAPESTRY.<sup>15</sup>  
19 We used a qualitative description approach.<sup>19 20</sup> This approach was suitable in providing an in-  
20 depth description of patient experiences in the program.<sup>19 20</sup>  
21  
22  
23  
24  
25  
26  
27

### 28 **Sample**

29  
30 The sample included older adults who were: (a) patients from the McMaster Family  
31 Health Team, (b) aged 70 years or older, (c) living in the community in Southern Ontario,  
32 Canada, and (d) allocated to the Health TAPESTRY program. Convenience sampling was used  
33 to seek clients who participated in the Health TAPESTRY program. Clients were excluded if  
34 they: (a) were living in long-term care facilities, (b) expected to be out of Canada for more than  
35 50% of the study duration, (c) were palliative or receiving end-of-life care, or (d) did not speak  
36 English.  
37  
38  
39  
40  
41  
42  
43  
44  
45

### 46 **Setting**

47  
48 The study was conducted in two primary care clinic sites of the Family Health Team  
49 located in a large urban area within Southern Ontario, Canada. These sites provide services to  
50 over 36,000 patients within the region who are followed-up by 37 family physicians. The teams  
51  
52  
53  
54  
55  
56  
57

are composed of family physicians, medical residents, nurses, nurse practitioners, pharmacists, and various allied health professionals.

### **Recruitment**

Initially, research team members purposively called all clients who completed the Health TAPESTRY program to invite them to take part in an interview. Some research team members had prior contact with participants from the evaluation of the Health TAPESTRY program. This recruitment strategy was later modified to ensure we obtained a more diverse sample of older adults based on gender, age [70 years and greater], and number of “alerts” [five or more “alerts”] generated from the Health TAPESTRY program in-home assessment such as: inadequate physical activity, risk for poor nutrition, and urinary incontinence.

### **Data collection**

Semi-structured individual interviews were conducted face-to-face at the university or by telephone from September 2015 to March 2016 at six-months post-enrolment in the RCT. The interview guide was developed through a literature review of primary care interventions and older adults with feedback from research team members and was pilot tested with three clients (See Table 1). Interviews were conducted by five research team members (MB, LC, NF, JG, FP) and took 40 minutes to complete. No interviews were repeated. Interviews continued until data saturation was reached (i.e. no new themes emerged).

**Table 1.** Interview guide for older adults participating in Health TAPESTRY

|                                                                                                                                                                                                                                                                        |
|------------------------------------------------------------------------------------------------------------------------------------------------------------------------------------------------------------------------------------------------------------------------|
| <p><b>Overall Understanding of Health TAPESTRY</b></p> <ol style="list-style-type: none"> <li>1) How would you describe the Health TAPESTRY program to others? What is its main purpose?</li> <li>2) What do you think are the benefits of Health TAPESTRY?</li> </ol> |
| <p><b>Implementation of Health TAPESTRY</b></p>                                                                                                                                                                                                                        |

- 1) Can you tell me about your experiences of:
  - a) getting signed up for Health TAPESTRY?
  - b) the process of scheduling your first volunteer visit?
  - c) receiving your first in-home volunteer visit?
  - d) completing various health-related surveys with volunteers?
  - e) setting up goals?
  - f) being introduced to the electronic personal health record by volunteers?
  - g) receiving follow-up from a family physician or the interprofessional team (e.g. dietitian, pharmacist, occupational therapist, etc.) at the clinic based on the report sent to them by the volunteers?
- 2) How has the Health TAPESTRY program affected your experiences communicating and working with members of your healthcare team?
- 3) As a result of Health TAPESTRY, were you linked or referred to any community programs or services such as home support or community groups? If so, tell me about your experiences with these programs or services.
- 4) How would you describe how your care was coordinated over the last six months?
- 5) How did Health TAPESTRY help you to meet your life and health goals?
- 6) What risks or challenges might exist from participating in Health TAPESTRY for you or other participants?

### **Sustainability and Scalability**

- 1) Based on your experiences, do you think Health TAPESTRY could be a regular program?
- 2) How do you see Health TAPESTRY being delivered or offered to older adults or other populations in Ontario or Canada?
- 3) Do you think Health TAPESTRY is ready to be spread elsewhere? Why or why not and what is needed to get there.

### **Data analysis**

Interviews were audio-taped, transcribed verbatim and then transcripts were coded independently by RV, LC, NF, FP, and JG. NVivo Version 10 was used to organize data.<sup>21</sup> Initially, a coding framework was created by LC and RV and was refined by transforming codes into themes. The refined framework was shared with the larger research team for review and feedback. Monthly research team meetings were held during data analysis to clarify themes. Data were analysed using the constant comparative approach.<sup>22</sup> To identify differences in perceptions

1  
2  
3 by clients across the two practice sites (Site A and Site B), we conducted matrix queries in  
4  
5 NVivo 10.<sup>21</sup>  
6

### 7 8 **Rigour and Trustworthiness** 9

10 Consolidated criteria for reporting qualitative research (COREQ) were used to report  
11 findings.<sup>23</sup> To increase the rigour and trustworthiness of findings, we used Lincoln and Guba's  
12 (1985) validation criteria (credibility, transferability, dependability, and confirmability).<sup>24</sup> To  
13 establish credibility, we used investigator triangulation by including researchers who brought  
14 different perspectives and experiences to data analysis, including gerontology, qualitative  
15 research, and primary care. To increase the transferability of findings, rich, thick descriptions  
16 were used to describe the study sample and setting.<sup>25</sup> Dependability and confirmability were  
17 considered by clearly documenting the research process and maintaining an audit trail.<sup>24</sup>  
18  
19  
20  
21  
22  
23  
24  
25  
26  
27

### 28 **Ethical considerations** 29

30 Ethics approval was obtained from the Hamilton Integrated Research Ethics Board  
31 (Project #14-726). Each participant provided written informed consent prior to being  
32 interviewed. Participants received a \$25 CAD gift card as a token of appreciation.  
33  
34  
35  
36

## 37 **RESULTS** 38

### 39 **Demographic characteristics** 40

41 A total of 32 older adults participated in this study with a mean age of 78.7 years  
42 (SD=6.1) (See Table 2). Half of the participants were female (50%) and most were married or  
43 had common law partners (68%). Most participants were Caucasian (96%) and had completed  
44 post-secondary or higher education (58%). Most participants had two or more chronic conditions  
45 (67%).  
46  
47  
48  
49  
50  
51  
52  
53  
54  
55  
56  
57

**Table 2.** Demographic characteristics of participants (N=32)

| Characteristics                                  | n (%)      |
|--------------------------------------------------|------------|
| Gender                                           |            |
| Female                                           | 16 (50.0%) |
| Male                                             | 16 (50.0%) |
| Age (years), mean (SD)                           | 78.7 (6.1) |
| Age range                                        |            |
| 70-79                                            | 19 (59.0%) |
| 80 and above                                     | 13 (41.0%) |
| Highest level of education, n=31                 |            |
| High school                                      | 11 (35.5%) |
| University (undergraduate)                       | 5 (16.1%)  |
| College diploma                                  | 4 (12.9%)  |
| Professional degree (nursing, teachers' college) | 4 (12.9%)  |
| Master's                                         | 3 (9.7%)   |
| Elementary                                       | 2 (6.5%)   |
| PhD                                              | 2 (6.5%)   |
| Country of birth:                                |            |
| Canada                                           | 19 (59.4%) |
| UK                                               | 6 (18.8%)  |
| Europe                                           | 5 (15.6%)  |
| Asia                                             | 2 (6.3%)   |
| Caucasian/White Ethnicity, n=24                  | 23 (95.8%) |
| Language Spoken: English                         | 32 (100%)  |
| Marital status, n=31                             |            |
| Married or Common law                            | 21 (67.7%) |
| Widowed/divorced/separated/single/never married  | 10 (32.3%) |
| Total number of chronic conditions ++, n=27      |            |
| 1 chronic condition                              | 9 (33.3%)  |
| 2 or more chronic conditions                     | 18 (66.6%) |
| Chronic conditions/diseases n (%) <sup>2</sup>   |            |
| Diabetes, n=26                                   | 9 (34.6%)  |
| Heart disease+, n=27                             | 9 (33.3%)  |
| Cancer, n=26                                     | 7 (26.9%)  |
| Osteoarthritis, n=26                             | 6 (23.1%)  |
| Hypertension, n=25                               | 7 (21.9%)  |
| COPD/Lung disease, n=25                          | 5 (20.0%)  |
| Stroke/Cerebrovascular disease, n=26             | 4 (15.4%)  |
| <b>Implementation site</b>                       |            |
| Site A                                           | 20 (62.5%) |
| Site B                                           | 12 (37.5%) |

Note. SD = Standard Deviation, COPD = Chronic Obstructive Pulmonary Disorder

N = total sample, n = number of participants who provided data

+ arteriosclerosis, angina pectoris, and heart failure

++ based on conditions listed above

## Categories

Themes describing older adults' perceptions of the Health TAPESTRY program are organized under four overarching categories including: (a) program goals, (b) experiences, (c) perceived impact, and (d) program sustainability and scalability. Each theme is described below. Differences in perceptions by clients in site A and B are noted only where they exist. Tables 3 to 5 provide an overview of the categories, related themes, and participant quotations to support them.

### 1. Program Goals

Most participants were unsure about Health TAPESTRY's goals and the process for sharing information with providers. The themes indicate that participants perceived that the main goals of the program were to: (a) obtain a comprehensive assessment of clients, (b) support older adults to live at home, and (c) improve care processes for healthy aging.

#### *Lack of clarity about the program's purpose and sharing of information*

Most participants (more from Site B than Site A) were unclear about the purpose of Health TAPESTRY and how their information was made available to providers. They perceived that researchers were simply collecting research data without clinical follow-up to provide concrete recommendations to improve their health. Participants reported that the collection of their data and the benefit of this activity was unknown to them. They felt unsure about the process that was used to collect their health information and pass on information to physicians. A few participants felt that the program may have been more helpful for the researchers than for older adults.

#### *Obtain a comprehensive assessment of clients*

Participants perceived that one of the goals of Health TAPESTRY was for providers to

collect information about their current health status, medical and social history, and lifestyle. Some participants felt that obtaining a comprehensive health assessment of older adults and providing their health information to providers ensured that continuity of care occurred. This resulted in saved time for practitioners. The program was also perceived as helping clinicians gain a broader understanding of the challenges that older adults face as they age.

#### *Support older adults to live at home*

Some participants perceived that another of Health TAPESTRY's goals was to ensure that older adults had their health and social care needs met so they could continue to live at home. They felt the program aimed to help them understand how to access health and social care services. Participants remarked that Health TAPESTRY aimed to develop strategies to improve how older adults live at home by first understanding their current health status and lifestyle.

#### *Improve care processes for healthy aging*

Some participants indicated that a goal of Health TAPESTRY was to improve general health and well-being through the application of holistic principles in caring for older adults. Participants felt that the program encouraged providers to explore where the gaps in health screening lie and come up with approaches to improve them. The program was perceived to explore various issues that impact the health of older adults at multiple levels (e.g., emotionally, physically, and intellectually) to be able to develop better plans of care.

**Table 3. Themes and sample participant quotes for program goals**

| Category             | Themes                                                                                                                                                                                                                                                                                                                                                                                                                                                         |
|----------------------|----------------------------------------------------------------------------------------------------------------------------------------------------------------------------------------------------------------------------------------------------------------------------------------------------------------------------------------------------------------------------------------------------------------------------------------------------------------|
| <b>Program goals</b> | <p><b>Lack of clarity about the program's purpose and sharing of information</b><br/> <i>I was always waiting for a purpose...the reason why you are doing this research, and really I never get the answer... And research, in my mind, it's when you are taking data, data, data, data and then you will come back to certain suggestions or a certain way or recommendation what I should do or what I will do...but it never came to that (R-106).</i></p> |

1  
2  
3  
4  
5  
6  
7  
8  
9  
10  
11  
12  
13  
14  
15  
16  
17  
18  
19  
20  
21  
22  
23  
24  
25  
26  
27  
28  
29  
30  
31  
32  
33  
34  
35  
36  
37  
38  
39  
40  
41  
42  
43  
44  
45  
46  
47  
48  
49  
50  
51  
52  
53  
54  
55  
56  
57  
58  
59  
60

*Well, my understanding it's for some kind of a program or a record...that maybe you want to compare with other people...I don't know how specific it is to me, or is it a group thing or a widespread thing...And it may have been more help to your end than my end, to be honest (R-29).*

*Well, I don't really know [how information from the home visit is shared.] I just figure you put it in the computer and I really don't know. (R-30)*

### **Obtain a comprehensive assessment of clients**

*... there will be a central data bank for me that will allow practitioners and professionals to access that file, which could save them hours and hours of doing the same research over and over again [...] they have available to them all of the information on me, my whole DNA, if I can call it that... (R-36).*

*...an attempt to acquire as much information as possible about senior citizens, their lifestyles, their diet, health and everything that one encounters as you approach old age (R-48).*

### **Support older adults to live at home**

*...the purpose of TAPESTRY, to make sure that people that are at home are being looked after properly and getting the proper care and know where they can get the proper care (R-270).*

*...the goal is to keep people healthy, keep them out of the hospital, nursing homes...but that's a big job (R-03).*

### **Improve care processes for healthy aging**

*...to try and fill in holes or see if it's working and where they can improve to help to take care of seniors that we, perhaps, made me feel I was important (R-145).*

*...you're going to come to certain conclusions; with the ultimate goal of being able to identify all the various issues that an aging person experiences and then being able to sort of put the theory into practice in your treatment of the elderly (R-114).*

## **2. Experiences with Health TAPESTRY**

Five themes were identified that describe the category client experiences with Health TAPESTRY: (a) variable personal benefit from goal-setting, (b) open and caring in-home visits by trained volunteers, (c) mixed experiences with provider follow-up after volunteer visits, (d) satisfaction with the Healthy Aging Series and (e) challenges with PHR technology.

1  
2  
3 *Variable personal benefit from goal-setting*  
4

5 About half of the participants felt that they benefitted from Health TAPESTRY's goal-  
6 setting and that it encouraged them to plan ahead. Participants were encouraged to take initiative  
7 in planning their own health and take better care of themselves by setting achievable goals,  
8 which were often related to improving diet and exercise habits. The other half of the participants  
9 reported few benefits from goal setting. Some felt that goals were irrelevant at their age and  
10 health conditions impacted their ability and need to set goals. Some participants reported  
11 frequently changing their goals, often due to their changing health status, therefore leading to  
12 unmet goals.  
13  
14  
15  
16  
17  
18  
19  
20  
21  
22

23  
24 *Open and caring in-home visits by trained volunteers*  
25

26 Many participants, mostly from site A, enjoyed receiving Health TAPESTRY home  
27 visits, stating they were convenient, relaxing, stimulating, and encouraged social interaction.  
28 Volunteers listened and were personable, caring and empathetic. Participants felt comfortable  
29 disclosing personal information to volunteers within their home environment and felt privileged  
30 to receive one-on-one attention and enough time to discuss their health in detail. They felt that  
31 scheduling of visits was flexible to meet their needs.  
32  
33  
34  
35  
36  
37  
38  
39

40 *Mixed experiences with provider follow-up after volunteer visits*  
41

42 Participants reported mixed experiences with primary care provider follow-up after  
43 volunteer visits for Health TAPESTRY. About half of the participants felt that receiving follow-  
44 up with clinicians related to issues identified during home visits worked well. Clients perceived  
45 that appointments were quickly booked and healthcare providers took initiative in following-up  
46 on reported issues of clients. The process of collection and reviewing health information, from  
47 volunteer to healthcare team to specialist referral, made them feel that their well-being was  
48  
49  
50  
51  
52  
53  
54  
55  
56  
57

important.

About half of the participants perceived that there was limited or inadequate provider follow-up of issues identified during in-home visits with volunteers. Some participants explained that they expected to be contacted by primary care providers after home visits or referred for tests or other services, but this did not happen. A few participants were not interested in receiving following-up and felt confident in managing their own health independently.

#### *Satisfaction with the Healthy Aging Series*

Participants were very satisfied with the Healthy Aging Series. The series was seen as interactive, educational, and addressed a range of topics (e.g., falls, exercise, nutrition, advanced care planning). Participants enjoyed learning from other older adults who shared their life experiences.

#### *Challenges with PHR technology*

Approximately half of the participants experienced challenges when attempting to access their PHR. Some older adults reported having issues with their computers and were therefore not able to access their PHR. Some participants preferred not to create a PHR account as they favoured having hard copies of their information instead.

**Table 4. Themes and sample participant quotes for experiences with Health TAPESTRY**

| Category                                | Themes                                                                                                                                                                                                                                                                                                                                                                                                                                                                                                                                                                                                                                               |
|-----------------------------------------|------------------------------------------------------------------------------------------------------------------------------------------------------------------------------------------------------------------------------------------------------------------------------------------------------------------------------------------------------------------------------------------------------------------------------------------------------------------------------------------------------------------------------------------------------------------------------------------------------------------------------------------------------|
| <b>Experiences with Health TAPESTRY</b> | <p><b>Variable personal benefit from goal-setting</b><br/> <i>...the goals were good because they jogged me to think...when you know you have got a finite piece of life left, it's probably a good idea to plan what you are going to do with it as well (R-118).</i></p> <p><i>...I think I'm too old to get those goals; because it was about exercising, right, and about walking. Well, I still don't walk that much because my back is so sore...Then I had an operation on my foot...So, you know, I do as good as I can (R-148).</i></p> <p><i>Well, I just, for me it just wasn't relevant. I mean, I joked and said, 'well my goal</i></p> |

1  
2  
3  
4  
5  
6  
7  
8  
9  
10  
11  
12  
13  
14  
15  
16  
17  
18  
19  
20  
21  
22  
23  
24  
25  
26  
27  
28  
29  
30  
31  
32  
33  
34  
35  
36  
37  
38  
39  
40  
41  
42  
43  
44  
45  
46  
47  
48  
49  
50  
51  
52  
53  
54  
55  
56  
57  
58  
59  
60

*is to be able to get up in the morning and function'; but I was, you know, being a bit facetious because at the time I wasn't feeling very well and it was sometimes very hard to just get out of bed (R-15)*

**Open and caring in-home visits by trained volunteers**

*...they [volunteers] explained everything and they interacted a lot; there was a lot of social interaction, so it was very good (R-118).*

*They were all very personable and attentive, caring, and listening with good listening skills (R-105).*

**Mixed experiences with provider follow-up after volunteer visits**

*...TAPESTRY sends in volunteers to assist the patient or the client; and depending on what their needs might be, they send in a specialist that might be of assistance...Myself I had an appointment with the doctor and the pharmacist to go over my drugs and that was very helpful (R-105).*

*I found it very helpful in that as a result of the personal interview I got some feedback from my doctor, I don't know, I won't say immediately, but almost; ...and she requested me to go into the office for a visit as a result of the TAPESTRY program (R-146).*

*They [clinicians] certainly don't contact me and say, well we received this from the TAPESTRY program or whatever and we're wondering if you could come in and talk to us...But none of that has happened; so I feel there's a disconnect...between the clinic and this program (R-15).*

**Satisfaction with the Healthy Aging Series**

*Very well done...one of the best sort of seminars I've been to in a long, long time...They didn't talk down to you, they asked you questions (R-99).*

*The information was fabulous. I was just blown away with the clients that came, they were so knowledgeable and so articulate and very attuned to the whole health issues (R-100).*

**Challenges with PHR technology**

*My computer has been down for about a month...and I think there's also a problem with my technology, it's probably pretty old. So I never was able to really access that [PHR] (R-105).*

**3. Perceived impact of Health TAPESTRY**

Three themes denote clients' perceived impact of Health TAPESTRY. Half of the participants felt that Health TAPESTRY resulted in small or no difference in their lives. Positive

1  
2  
3 impacts perceived by some participants were: (a) satisfaction and confidence with the primary  
4 care team and healthcare system and (b) change in health behaviours or ways of thinking.  
5  
6

7  
8 *Small or no difference in the lives of clients*  
9

10 More participants from site B than from site A felt that the program resulted in little to no  
11 change in their lives. These participants explained that Health TAPESTRY did not result in  
12 lifestyle changes but in some cases, increased their awareness of healthy living. Some felt that  
13 they were already aware of available community services.  
14  
15  
16  
17

18  
19 *Satisfaction and confidence with the primary care team and healthcare system*  
20

21 Some participants, relatively more from Site B, described satisfaction and confidence  
22 with the primary care team and healthcare system as a result of the program. Participants in  
23 general attributed faster follow-up of health-related issues to Health TAPESTRY versus usual  
24 care and indicated that the program ensured that they received test results. Participants felt that  
25 the program increased collaborative care between older adults and providers and ensured they  
26 had an active role in managing their own health. The program also increased client satisfaction  
27 by connecting them to community programs such as exercise classes and providing suggestions  
28 to improve their daily functioning.  
29  
30  
31  
32  
33  
34  
35  
36  
37  
38  
39

40 Health TAPESTRY was perceived as filling existing gaps in primary healthcare by  
41 complementing the practice of physicians and offering informative health-related seminars.  
42 Family physicians were perceived by participants as having to fulfil many responsibilities in  
43 usual care. Health TAPESTRY was therefore seen as an efficient approach for physicians to  
44 understand how clients live at home and their care needs through lay volunteers' reports.  
45  
46  
47  
48  
49  
50

51 *Change in health behaviours or ways of thinking*  
52

53 About one third of participants felt that Health TAPESTRY resulted in a positive change  
54  
55  
56  
57

1  
2  
3 in health behaviours such as improved diet and increased physical activity. Clients felt better  
4 prepared to discuss their health with providers. Some participants felt they had a more positive  
5 attitude towards their health and were optimistic about improving it. Having meaningful  
6 interactions with volunteers made participants more aware of emerging health issues associated  
7 with aging.  
8  
9  
10  
11  
12  
13

#### 14 **4. Sustainability and scalability of Health TAPESTRY**

15  
16 Participants provided insight into the category sustainability and scalability of Health  
17 TAPESTRY. Themes that emerged were: (a) the program is viewed as sustainable, (b) the  
18 program may be relevant for different communities and populations, and (c) barriers to program  
19 sustainability exist.  
20  
21  
22  
23  
24  
25

##### 26 *The program is viewed as sustainable*

27  
28 Health TAPESTRY was perceived by some participants to be sustainable and could be  
29 part of a regular program offered through family practices. Participants perceived that the  
30 program could be helpful for the prevention of disease and poor outcomes frequently  
31 encountered by older adults.  
32  
33  
34  
35  
36  
37

##### 38 *The program may be relevant for different communities and populations*

39  
40 Most participants felt that Health TAPESTRY could be scaled to various communities  
41 and populations throughout Canada. Participants explained that particular communities and  
42 populations had the potential to benefit from the program such as clients living in rural and  
43 isolated communities, younger clients, clients confined to their homes, and Indigenous  
44 communities.  
45  
46  
47  
48  
49  
50

##### 51 *Barriers to program sustainability exist*

52  
53 About half of the participants reported barriers to sustainability of Health TAPESTRY.  
54  
55  
56  
57

They perceived that the availability of staff and salary costs of providers to maintain the program could negatively impact sustainability. Participants identified public perceptions that the healthcare system is focused on cost-efficiency and that essential programs may not necessarily be funded due to high costs. They also reported that it may be challenging to increase awareness of the program to new users.

**Table 5. Themes and sample participant quotes for impact, sustainability, and scalability**

| Category         | Themes                                                                                                                                                                                                                                                                                                                                                                                                                                                                                                                                                                                                                                                                                                                                                                                                                                                                                                                                                                                                                                                                                                                                                                                                                                                                                                                                                                                                                                                                                                                                                                                                                                                                                                                                                                                                                                                                  |
|------------------|-------------------------------------------------------------------------------------------------------------------------------------------------------------------------------------------------------------------------------------------------------------------------------------------------------------------------------------------------------------------------------------------------------------------------------------------------------------------------------------------------------------------------------------------------------------------------------------------------------------------------------------------------------------------------------------------------------------------------------------------------------------------------------------------------------------------------------------------------------------------------------------------------------------------------------------------------------------------------------------------------------------------------------------------------------------------------------------------------------------------------------------------------------------------------------------------------------------------------------------------------------------------------------------------------------------------------------------------------------------------------------------------------------------------------------------------------------------------------------------------------------------------------------------------------------------------------------------------------------------------------------------------------------------------------------------------------------------------------------------------------------------------------------------------------------------------------------------------------------------------------|
| Perceived impact | <p><b>Small or no difference in the lives of clients</b><br/> <i>I guess [Health TAPESTRY] just makes me more and more aware, I think, of what I am doing. I didn't make any particular or specific changes to the way I live or eat or do anything (R-172).</i></p> <p><i>I don't think there's anything that TAPESTRY said or did that made any changes that I can see, no (R-30).</i></p> <p><b>Satisfaction and confidence with the primary care team and healthcare system</b><br/> <i>...I am happy that I did join with TAPESTRY, because it really speeded up my [care]— and hopefully this second problem what I have here with that hand, if that can be speeded up somehow to get the results, then I am happy with the practice of TAPESTRY (R-106).</i></p> <p><i>Well, I'm pretty sure that whatever connection you had with the clinic did promote a few points in my favour. And even my pharmacist, he even got word from the clinic that things were changing for my prescriptions. So, they were acting on the advice that you gave them (R-250).</i></p> <p><i>...I would also find that there are areas that the doctor can't possibly cover and TAPESTRY is certainly making an attempt to cover all facets of the healthcare system, particularly through the Healthy Aging Series (R-146).</i></p> <p><b>Change in health behaviours or ways of thinking</b><br/> <i>...I wasn't walking before that. I wouldn't walk farther than my nose. But now I've started walking, and even as I say, some days when I don't feel it, now I say, go do it (R-129).</i></p> <p><i>...the TAPESTRY program improved my knowledge of what my own health was about and it helped me to be more prepared...going into a doctor's appointment or whoever I am talking with...to be able to discuss and understand what I have to do to improve (R-75).</i></p> |

|                                              |                                                                                                                                                                                                                                                                                                                                                                                                                                                                                                                                                                                                                                                                                                                                                                                                                                                                                                                                                                                                                                                                                                                                                                                                                                                                                                                                                                                                                                                                                                                                                                                                                                                                                                                                                                                |
|----------------------------------------------|--------------------------------------------------------------------------------------------------------------------------------------------------------------------------------------------------------------------------------------------------------------------------------------------------------------------------------------------------------------------------------------------------------------------------------------------------------------------------------------------------------------------------------------------------------------------------------------------------------------------------------------------------------------------------------------------------------------------------------------------------------------------------------------------------------------------------------------------------------------------------------------------------------------------------------------------------------------------------------------------------------------------------------------------------------------------------------------------------------------------------------------------------------------------------------------------------------------------------------------------------------------------------------------------------------------------------------------------------------------------------------------------------------------------------------------------------------------------------------------------------------------------------------------------------------------------------------------------------------------------------------------------------------------------------------------------------------------------------------------------------------------------------------|
| <p><b>Sustainability and scalability</b></p> | <p><b>The program is viewed as sustainable</b><br/> <i>It should be [Health TAPESTRY should be a regular program] ...because they always say an ounce of prevention in healthcare, and you know what, if you can catch things before they become too serious, or identify possible health outcomes through your interviews and through regular monitoring, then that would be really desirable, especially for the elderly (R-114).</i></p> <p><b>The program may be relevant for different communities and populations</b><br/> <i>...it should be a program that's offered to a much wider scope of people... or even healthy people that are healthy at the moment (R-146).</i></p> <p><i>I think that [Health TAPESTRY] could apply to people much younger who are confined to their homes (R-95).</i></p> <p><b>Barriers to program sustainability exist</b><br/> <i>I don't know how much publicity you have been able to use, but I think if everybody involved are aware of your services and there are things that you could bring to the table, I'm sure they wouldn't resist that. But my feeling is that...Maybe not enough people know about it (R-29).</i></p> <p><i>...I think systematically it's [Health TAPESTRY] not sustainable because that's not how the system works...every time there's this big initiative to push toward prevention, it's with an eye on saving money, but then that cost usually does mean that some other program that's really needed is just not going to get funded...if you can't measure the dollars, you lose a lot of the buy-in (R-1)</i></p> <p><i>Barriers would probably be people to work in the program. For example, the number of doctors and nurses, to have enough staff to continue the program (R-75).</i></p> |
|----------------------------------------------|--------------------------------------------------------------------------------------------------------------------------------------------------------------------------------------------------------------------------------------------------------------------------------------------------------------------------------------------------------------------------------------------------------------------------------------------------------------------------------------------------------------------------------------------------------------------------------------------------------------------------------------------------------------------------------------------------------------------------------------------------------------------------------------------------------------------------------------------------------------------------------------------------------------------------------------------------------------------------------------------------------------------------------------------------------------------------------------------------------------------------------------------------------------------------------------------------------------------------------------------------------------------------------------------------------------------------------------------------------------------------------------------------------------------------------------------------------------------------------------------------------------------------------------------------------------------------------------------------------------------------------------------------------------------------------------------------------------------------------------------------------------------------------|

## DISCUSSION

### Key Findings

This study revealed that the Health TAPESTRY program was perceived by older adults as having many positive attributes (e.g. home visits, comprehensive assessments, and satisfaction with the team). However, most clients were not clear about the purpose of the program. Some clients were unaware of how the program was meant to benefit them and thought that they were primarily helping the researchers by providing them with data. There were mixed findings related to the value of goal setting, with some clients finding it helpful for behaviour change and

1  
2  
3 others finding it irrelevant or difficult. Participants also had mixed experiences with follow-up by  
4  
5 the primary care team after volunteer visits. Some clients felt that there was a disconnect  
6  
7 between the Health TAPESTRY program and the primary care clinic as they felt their  
8  
9 information was either not given to or acted on by the primary care team. Other clients felt that  
10  
11 Health TAPESTRY had actually sped up actions taken by the team as they were able to book  
12  
13 earlier appointments with providers to discuss their health issue. Using PHR technology was  
14  
15 found to create numerous challenges and some clients preferred not to use the technology.  
16  
17  
18 Participants felt the program was sustainable and scalable but identified potential barriers to  
19  
20 sustainability and scalability such as funding, staffing, and publicity.  
21  
22

### 23 **Comparison with existing literature**

24  
25  
26 Previous studies have similarly found that providing in-home visits by volunteers and  
27  
28 peer mentors positively impacted the health and general well-being of older adults.<sup>26 27</sup> A home-  
29  
30 based program targeting physical activity, nutrition, and social support conducted by trained  
31  
32 nonprofessional volunteers has been found to improve the nutritional status of community-  
33  
34 dwelling pre-frail and frail older adults and decrease the prevalence of frailty.<sup>27</sup> Peer volunteers  
35  
36 who provide client support to learn self-management skills can increase physical activity among  
37  
38 older adults living in the community.<sup>26</sup> Community-dwelling older adults have been found to  
39  
40 have improved health outcomes with social support alone,<sup>27</sup> revealing that many older adults are  
41  
42 impacted by social isolation.<sup>28</sup> Health TAPESTRY clients felt that in-home visits by volunteers  
43  
44 encouraged social interaction and created awareness about their health. Volunteer support and  
45  
46 PHR technology has been known to have positive effects in improving health<sup>26 27</sup> and create  
47  
48 active client engagement in care.<sup>29</sup> In the current study however when combined, they provide a  
49  
50  
51  
52  
53  
54  
55  
56  
57  
58  
59  
60

1  
2  
3 link between clients living in their homes and communities and the primary care practices where  
4 they receive healthcare.  
5  
6

7  
8 Goal-setting has been shown to encourage shared decision-making between clients and  
9 physicians<sup>30</sup> and improve outcomes associated with clinical interventions aimed at disease  
10 prevention and maintaining function.<sup>31</sup> The current study revealed that there were mixed  
11 experiences related to health goal-setting and receiving follow-up by providers. Although  
12 typically found in mixed methods research, conflicting findings can also be found among  
13 complex issues in social research.<sup>32</sup> Integrating differing views from participants can help  
14 provide a complete description through a complementary approach.<sup>32</sup> Goal-setting in this current  
15 study was seen as having varied benefits in improving health for older adults. This finding may  
16 be related to differences in available social support systems. Saajanaho et al. (2016) found that  
17 older adults with poor social resources were at a greater risk for having no health goals in their  
18 lives compared to older adults with greater social support.<sup>33</sup> Goals focusing on maintaining  
19 health were often made by older adults with good health resources while older adults with poor  
20 resources typically made goals related to health recovery.<sup>33</sup>  
21  
22  
23  
24  
25  
26  
27  
28  
29  
30  
31  
32  
33  
34  
35  
36  
37

38 Findings from the current study support previous evidence that interdisciplinary team-  
39 based primary care enhances quality of care for individuals, increase confidence and satisfaction  
40 with the healthcare system, and enhance client-centred practice.<sup>34</sup> Using this approach also helps  
41 older adults better connect with community support services (e.g. meal, transportation, and  
42 volunteer-visit services).<sup>35</sup> Many participants in the present study had multiple chronic  
43 conditions and findings provide support for an interprofessional primary care clinic model for  
44 community-dwelling older adults to provide ample time for clients to discuss their health needs  
45 and meet their needs through a single visit.<sup>3</sup> Health TAPESTRY was perceived as providing  
46  
47  
48  
49  
50  
51  
52  
53  
54  
55  
56  
57

1  
2  
3 multiple opportunities to consult with various healthcare providers and provided in-home visits  
4  
5 with volunteers who were interested in hearing clients' perspectives on health.  
6

7  
8 Some challenges revealed in the current study were related to the limited uptake of  
9  
10 technology and not seeing the added benefits of using PHR technology. The uptake of  
11  
12 technology has been found to be influenced by multiple factors such as interest, competency, and  
13  
14 usefulness. Older adults adopt technology when they feel that there is a need to do so and  
15  
16 technology is perceived as user-friendly.<sup>36</sup> Older adults require more support in using technology  
17  
18 to locate high quality evidence on the internet, access their health information, and explore the  
19  
20 risks of privacy breaches online.<sup>37</sup>  
21  
22

23  
24 Participants in the current study identified barriers that need to be addressed to support  
25  
26 sustainability and scalability of Health TAPESTRY. These included funding, human resources,  
27  
28 and public awareness of the program to support recruitment. Similar barriers have been found in  
29  
30 a review of public health interventions including intervention costs, inadequate human resources,  
31  
32 staff recruitment and turnover, and inflexible funding structures unresponsive of scale-up.<sup>38</sup> A  
33  
34 study that explored the perspectives of the Health TAPESTRY team on sustainability and  
35  
36 scaling-up found that staffing resources (i.e. volunteers and providers) and funding capacities as  
37  
38 well as attempting to gain the interest of stakeholders in the program were barriers to sustaining  
39  
40 the program.<sup>39</sup> To overcome sustainability challenges, strategies such as embedding  
41  
42 sustainability assessments as part of an implementation plan are needed to better anticipate and  
43  
44 address barriers.  
45  
46  
47

## 48 49 **Strengths and Limitations**

50  
51 This study included participants with different health conditions and included a rigorous  
52  
53 analytic method involving numerous experts in primary care, aging, evaluation, and qualitative  
54  
55  
56  
57

1  
2  
3 research. It explored multiple facets of the program (e.g. goals, experiences, perceived impact,  
4 and sustainability and scalability). Other studies do not provide a comprehensive evaluation of  
5 primary care programs by exploring clients' perspectives.<sup>27 40 41</sup> They are often focused on  
6 quantitative outcome measures to determine effectiveness rather than perceived usefulness of  
7 programs by clients. Some limitations of the current study were a lack of cultural diversity  
8 among participants and the exclusion of non-English-speaking clients. Two practice sites within  
9 one area of Ontario representing one model of primary care, the family health team, limits  
10 transferability of results.  
11  
12  
13  
14  
15  
16  
17  
18  
19  
20

## 21 **CONCLUSIONS**

22  
23  
24 Health TAPESTRY was perceived by older clients as ensuring that their needs were met  
25 through an interprofessional primary care model. Although the program was generally perceived  
26 as valuable as it incorporated comprehensive assessments, seminars, and an interdisciplinary  
27 approach, the purpose of Health TAPESTRY and how information was shared was unclear to  
28 most clients. Clients were unsure about the kind of benefits they could expect. The study  
29 revealed the need to explore client experiences to help modify and adapt primary care programs.  
30  
31 Future research should include older adults as partners in shaping primary care programs. The  
32 purpose of research and programs need to be clear for clients and their understanding of the aims  
33 of primary care programs should be discussed at the start of an intervention. Researchers  
34 interested in testing interventions in primary care should also consider implementing strategies  
35 for scaling-up programs in the early phases of research, with active engagement of patients and  
36 other partners.  
37  
38  
39  
40  
41  
42  
43  
44  
45  
46  
47  
48  
49  
50  
51  
52  
53  
54  
55  
56  
57  
58  
59  
60

### **Consent for publication**

Not applicable.

### **Availability of data**

The data for this research consists of interview transcripts. We are unable to make raw data publicly available in order to respect the confidentiality of participants.

### **Competing interests**

The authors declare no conflicts of interest with respect to the authorship and/or publication of this article.

### **Funding**

This research was funded by a Health Canada Federal Innovations grant, the Ministry of Health and Long-term Care of Ontario, the Labarge Optimal Aging Initiative and the McMaster Family Health Organization.

### **Authors' contributions**

RV conceptualized and led the study. MB, LC, NF, FP, and JG collected the data. RV and LC conducted the initial analysis, and subsequent analysis with FP and JG. JP and MY wrote the initial drafts of the paper. GA, DM, DO, CR, JG, LD, and MK contributed to validating the analysis, reviewing, and contributing to drafts. All authors read and approved the final manuscript.

### **Acknowledgements**

We thank all of the study participants and our primary care partners for their contributions to this research. We thank Mehreen Bhamani and Nola Fuller for their assistance with data collection.

**REFERENCES**

1. Hutchison B, Glazier R. Ontario's primary care reforms have transformed the local care landscape, but a plan is needed for ongoing improvement. *Health Aff* 2013 Apr 1;32(4):695-703.
2. Boyd CM, Boulton C, Shadmi E, *et al*. Guided care for multimorbid older adults. *Gerontologist* 2007 Oct 1;47(5):697-704.
3. Tracy CS, Bell SH, Nickell LA, *et al*. The IMPACT clinic: Innovative model of interprofessional primary care for elderly patients with complex health care needs. *Can Fam Physician* 2013 Mar 1;59(3):e148-55.
4. Shafir A, Garrigues SK, Schenker Y, *et al*. Homebound patient and caregiver perceptions of quality of care in home-based primary care: A qualitative study. *J Am Geriatr Soc* 2016 Aug 1;64(8):1622-7.
5. Berwick DM, Nolan TW, Whittington J. The triple aim: Care, health, and cost. *Health Aff* 2008 May;27(3):759-69.
6. Doyle C, Lennox L, Bell D. A systematic review of evidence on the links between patient experience and clinical safety and effectiveness. *BMJ Open* 2013 Jan 1;3:1-18.
7. Kuluski K, Nelson ML, Tracy CS, *et al*. Experience of care as a critical component of health system performance measurement: Recommendations for moving forward. *Healthc Pap* 2017 Oct;17(2):8-20.
8. Domecq JP, Prutsky G, Elraiyah T, *et al*. Patient engagement in research: a systematic review. *BMC Health Serv Res* 2014 Dec;14(89):1-9.
9. Sullivan P, Goldmann D. The promise of comparative effectiveness research. *JAMA* 2011; 305(4):400-1.

- 1  
2  
3 10. Franks P, Fiscella K. Primary care physicians and specialists as personal physicians.  
4  
5 Health care expenditures and mortality experience. *J Fam Pract* 1998; 47(2): 105-9.  
6  
7
- 8 11. Starfield B. Primary care and health: A cross-national comparison. *JAMA* 1991; 266(16):  
9  
10 2268-71  
11
- 12 12. Starfield B. Is primary care essential? *Lancet* 1994 Oct 22;344(8930):1129-33.  
13
- 14 13. Starfield B, Shi L, Macinko J. Contribution of primary care to health systems and health.  
15  
16 *Milbank Q* 2005; 83(3): 457-502.  
17
- 18 14. Mangin D. The contribution of primary care research to improving health services. In:  
19  
20 Goodyear-Smith F, Mash B, eds. *International Perspectives on Primary Care Research*.  
21  
22 Boca Raton, FL: CRC Press; 2016:67-72.  
23  
24
- 25 15. Dolovich L, Oliver D, Lamarche L, *et al*. A protocol for a pragmatic randomized  
26  
27 controlled trial using the Health Teams Advancing Patient Experience: Strengthening  
28  
29 Quality (Health TAPESTRY) platform approach to promote person-focused primary  
30  
31 healthcare for older adults. *Implement Sci* 2015 Dec;11(49):1-14.  
32  
33
- 34 16. Roy M, Levasseur M, Couturier Y, *et al*. The relevance of positive approaches to health  
35  
36 for patient-centered care medicine. *Prev Med Rep* 2015 Jan 1;2:10-2.  
37  
38
- 39 17. Oliver D, Dolovich L, Lamarche L, *et al*. A volunteer program to connect primary care  
40  
41 and the home to support the health of older adults: A community case study. *Front Med*  
42  
43 2018 Feb 26;5(48):1-6.  
44  
45
- 46 18. Lamarche L, Oliver D, Cleghorn L, *et al*. Using aggregate data on health goals, not  
47  
48 disease diagnoses, to develop and implement a healthy aging group education series. *J*  
49  
50 *Community Med Health Educ* 2017;7:4:1-7.  
51  
52  
53  
54  
55

- 1  
2  
3  
4 19. Sandelowski M. Focus on research methods-whatever happened to qualitative  
5  
6 description? *Res Nurs Health* 2000 Aug;23(4):334-40.
- 7  
8 20. Sandelowski M. What's in a name? Qualitative description revisited. *Res Nurs Health*  
9  
10 2010 Feb 1;33(1):77-84.
- 11  
12 21. NVivo qualitative data analysis Software; QSR International Pty Ltd. Version 10, 2012.
- 13  
14 22. Bryman A. *Social Research Methods*. 5th ed. Oxford, UK: Oxford University Press;  
15  
16 2016.
- 17  
18 23. Tong A, Sainsbury P, Craig J. Consolidated criteria for reporting qualitative research  
19  
20 (COREQ): A 32-item checklist for interviews and focus groups. *Int J Qual Health Care*  
21  
22 2007;19(6):349-357.
- 23  
24  
25 24. Lincoln YS, Guba EG. *Naturalistic inquiry*. Sage Publications, 1985.
- 26  
27 25. Creswell JW. *Qualitative inquiry and research design: Choosing among five approaches*.  
28  
29 3<sup>rd</sup> ed. Thousands Oak, CA: Sage Publications, 2013.
- 30  
31  
32 26. Buman MP, Giacobbi PR Jr, Dzierzewski JM, *et al*. Peer volunteers improve long-term  
33  
34 maintenance of physical activity with older adults: A randomized controlled trial. *J Phys*  
35  
36 *Act Health* 2011; September;8(Suppl 2):S257–66.
- 37  
38  
39 27. Luger E, Dorner TE, Haider S, *et al*. Effects of a home-based and volunteer-administered  
40  
41 physical training, nutritional, and social support program on malnutrition and frailty in  
42  
43 older persons: A randomized controlled trial. *J Am Med Dir Assoc* 2016 Jul 1;17(7):671-  
44  
45 9.
- 46  
47  
48 28. Smith SG, Jackson SE, Kobayashi LC, *et al*. Social isolation, health literacy, and  
49  
50 mortality risk: Findings from the English Longitudinal Study of Ageing. *Health Psychol*  
51  
52 2018 Feb;37(2):160-9.
- 53  
54  
55

- 1  
2  
3  
4 29. Krist AH, Woolf SH, Bello GA, *et al.* Engaging primary care patients to use a patient-  
5 centered personal health record. *Ann Fam Med* 2014 Sep 1;12(5):418-26.  
6  
7  
8 30. Naik AD, Schulman-Green D, McCorkle R, *et al.* Will older persons and their clinicians  
9 use a shared decision-making instrument? *J Gen Intern Med* 2005 Jul 1;20(7):640-3.  
10  
11  
12 31. Schulman-Green DJ, Naik AD, Bradley EH, *et al.* Goal setting as a shared decision  
13 making strategy among clinicians and their older patients. *Patient Educ Couns* 2006 Oct  
14 1;63(1-2):145-51.  
15  
16  
17 32. Slonim-Nevo V, Nevo I. Conflicting findings in mixed methods research: An illustration  
18 from an Israeli study on immigration. *J Mix Methods Res* 2009 Apr;3(2):109-28.  
19  
20  
21 33. Saajanaho M, Rantakokko M, Portegijs E, *et al.* Life resources and personal goals in old  
22 age. *Eur J Ageing* 2016 Sep 1;13(3):195-208.  
23  
24  
25 34. Jesmin S, Thind A, Sarma S. Does team-based primary health care improve patients'  
26 perception of outcomes? Evidence from the 2007–08 Canadian Survey of Experiences  
27 with Primary Health. *Health Policy* 2012 Apr 1;105(1):71-83.  
28  
29  
30 35. Ploeg J, Denton M, Hutchison B, *et al.* Primary health care providers' perspectives:  
31 Facilitating older patients' access to community support services. *Can J Aging* 2016  
32 Dec;35(4):499-512.  
33  
34  
35 36. Hanson VL. Influencing technology adoption by older adults. *Interact Comput* 2010 Sep  
36 21;22(6):502-9.  
37  
38  
39 37. Ware P, Bartlett SJ, Paré G, *et al.* Using eHealth technologies: Interests, preferences, and  
40 concerns of older adults. *Interact J Med Res* 2017 Jan;6(1):1-16.  
41  
42  
43 38. Milat AJ, Bauman A, Redman S. Narrative review of models and success factors for  
44 scaling up public health interventions. *Implement Sci* 2015 Dec;10(113):1-11.  
45  
46  
47  
48  
49  
50  
51  
52  
53  
54  
55

- 1  
2  
3  
4 39. Kastner M, Sayal R, Oliver D, *et al.* Sustainability and scalability of a volunteer-based  
5  
6 primary care intervention (Health TAPESTRY): A mixed-methods analysis. *BMC Health*  
7  
8 *Serv Res* 2017 Dec;17(514):1-21.  
9
- 10 40. Counsell SR, Callahan CM, Clark DO, *et al.* Geriatric care management for low-income  
11  
12 seniors: A randomized controlled trial. *Jama* 2007 Dec 12;298(22):2623-33.  
13
- 14 41. Huss A, Stuck AE, Rubenstein LZ, *et al.* Multidimensional preventive home visit  
15  
16 programs for community-dwelling older adults: A systematic review and meta-analysis of  
17  
18 randomized controlled trials. *J Gerontol A Biol Sci Med Sci* 2008 Mar 1;63(3):298-307.  
19  
20  
21  
22  
23  
24  
25  
26  
27  
28  
29  
30  
31  
32  
33  
34  
35  
36  
37  
38  
39  
40  
41  
42  
43  
44  
45  
46  
47  
48  
49  
50  
51  
52  
53  
54  
55

**Manuscript:** Perceptions of Older Adults on the Implementation and Impact of a Primary Care Program, Health Teams Advancing Patient Experience: Strengthening Quality (Health TAPESTRY)

### Consolidated criteria for reporting qualitative studies (COREQ): 32-item checklist

Developed from:

Tong A, Sainsbury P, Craig J. Consolidated criteria for reporting qualitative research (COREQ): A 32-item checklist for interviews and focus groups. *Int J Qual Health Care* 2007;19(6):349-357.

| Topic                                          | Item No. | Guide Questions/Descriptions                                                                                                                               | Reported on Page No. |
|------------------------------------------------|----------|------------------------------------------------------------------------------------------------------------------------------------------------------------|----------------------|
| <b>Domain 1: Research team and reflexivity</b> |          |                                                                                                                                                            |                      |
| <i>Personal characteristics</i>                |          |                                                                                                                                                            |                      |
| Interviewer/Facilitator                        | 1        | Which authors conducted the interview or focus group?                                                                                                      | P. 8                 |
| Credentials                                    | 2        | What were the researchers' credentials? (e.g. PhD, MD, MSc)                                                                                                | P. 1                 |
| Occupation                                     | 3        | What were the researchers' occupation at the time of the study?                                                                                            | P. 1                 |
| Gender                                         | 4        | Were the researchers male or female?                                                                                                                       | P. 1                 |
| Experience and training                        | 5        | What experience or training did the researchers have?                                                                                                      | P. 10                |
| <i>Relationship with participants</i>          |          |                                                                                                                                                            |                      |
| Relationship established                       | 6        | Was a relationship established prior to study commencement?                                                                                                | P. 8                 |
| Participant knowledge of the interviewers      | 7        | What did the participants know about the researchers? (e.g. personal goals, reasons for doing the research)                                                | P. 10                |
| Interviewer characteristics                    | 8        | What characteristics were reported about the interviewers? (e.g. Bias, assumptions, reasons and interests in the research topic)                           | N/A                  |
| <b>Domain 2: Study design</b>                  |          |                                                                                                                                                            |                      |
| <i>Theoretical framework</i>                   |          |                                                                                                                                                            |                      |
| Methodological orientation and Theory          | 9        | What methodological orientation was stated to underpin the study? (e.g. grounded theory, discourse analysis, ethnography, phenomenology, content analysis) | P. 7                 |
| <i>Participant selection</i>                   |          |                                                                                                                                                            |                      |

|    |                                        |    |                                                                                      |
|----|----------------------------------------|----|--------------------------------------------------------------------------------------|
| 1  |                                        |    |                                                                                      |
| 2  |                                        |    |                                                                                      |
| 3  |                                        |    |                                                                                      |
| 4  | Sampling                               | 10 | How were participants selected? (e.g. purposive, convenience, consecutive, snowball) |
| 5  |                                        |    |                                                                                      |
| 6  |                                        |    |                                                                                      |
| 7  | Method of approach                     | 11 | How were participants approached? (e.g. face-to-face, telephone, mail, email)        |
| 8  |                                        |    |                                                                                      |
| 9  |                                        |    |                                                                                      |
| 10 |                                        |    |                                                                                      |
| 11 | Sample size                            | 12 | How many participants were in the study?                                             |
| 12 |                                        |    |                                                                                      |
| 13 | Non-participation                      | 13 | How many people refused to participate or dropped out? Reasons?                      |
| 14 |                                        |    |                                                                                      |
| 15 |                                        |    |                                                                                      |
| 16 | <i>Setting</i>                         |    |                                                                                      |
| 17 | Setting of data collection             | 14 | Where was the data collected? (e.g. home, clinic, workplace)                         |
| 18 |                                        |    |                                                                                      |
| 19 | Presence of non-participants           | 15 | Was anyone else present besides the participants and researchers?                    |
| 20 |                                        |    |                                                                                      |
| 21 | Description of sample                  | 16 | What are the important characteristics of the sample? (e.g. demographic data, date)  |
| 22 |                                        |    |                                                                                      |
| 23 |                                        |    |                                                                                      |
| 24 |                                        |    |                                                                                      |
| 25 |                                        |    |                                                                                      |
| 26 | <i>Data collection</i>                 |    |                                                                                      |
| 27 | Interview guide                        | 17 | Were questions, prompts, guides provided by the authors? Was it pilot tested?        |
| 28 |                                        |    |                                                                                      |
| 29 |                                        |    |                                                                                      |
| 30 |                                        |    |                                                                                      |
| 31 | Repeat interviews                      | 18 | Were repeat inter views carried out? If yes, how many?                               |
| 32 |                                        |    |                                                                                      |
| 33 | Audio/visual recording                 | 19 | Did the research use audio or visual recording to collect the data?                  |
| 34 |                                        |    |                                                                                      |
| 35 | Field notes                            | 20 | Were field notes made during and/or after the interview or focus group?              |
| 36 |                                        |    |                                                                                      |
| 37 |                                        |    |                                                                                      |
| 38 | Duration                               | 21 | What was the duration of the interviews or focus group?                              |
| 39 |                                        |    |                                                                                      |
| 40 |                                        |    |                                                                                      |
| 41 | Data saturation                        | 22 | Was data saturation discussed?                                                       |
| 42 |                                        |    |                                                                                      |
| 43 | Transcripts returned                   | 23 | Were transcripts returned to participants for comment and/or correction?             |
| 44 |                                        |    |                                                                                      |
| 45 | <b>Domain 3: analysis and findings</b> |    |                                                                                      |
| 46 | <i>Data analysis</i>                   |    |                                                                                      |
| 47 |                                        |    |                                                                                      |
| 48 | Number of data coders                  | 24 | How many data coders coded the data?                                                 |
| 49 |                                        |    |                                                                                      |
| 50 | Description of the coding tree         | 25 | Did authors provide a description of the coding tree?                                |
| 51 |                                        |    |                                                                                      |
| 52 | Derivation of themes                   | 26 | Were themes identified in advance or derived from the data?                          |
| 53 |                                        |    |                                                                                      |
| 54 | Software                               | 27 | What software, if applicable, was used to manage the data?                           |
| 55 |                                        |    |                                                                                      |
| 56 |                                        |    |                                                                                      |
| 57 |                                        |    |                                                                                      |
| 58 |                                        |    |                                                                                      |
| 59 |                                        |    |                                                                                      |
| 60 |                                        |    |                                                                                      |

|                              |    |                                                                                                                                   |          |
|------------------------------|----|-----------------------------------------------------------------------------------------------------------------------------------|----------|
| Participant checking         | 28 | Did participants provide feedback on the findings?                                                                                | N/A      |
| <i>Reporting</i>             |    |                                                                                                                                   |          |
| Quotations presented         | 29 | Were participant quotations presented to illustrate the themes/findings? Was each quotation identified? (e.g. participant number) | P. 12-21 |
| Data and findings consistent | 30 | Was there consistency between the data presented and the findings?                                                                | P. 12-21 |
| Clarity of major themes      | 31 | Were major themes clearly presented in the findings?                                                                              | P. 12-21 |
| Clarity of minor themes      | 32 | Is there a description of diverse cases or discussion of minor themes?                                                            | P. 12-21 |

# BMJ Open

## Perceptions of Older Adults in Ontario, Canada on the Implementation and Impact of a Primary Care Program, Health Teams Advancing Patient Experience: Strengthening Quality (Health TAPESTRY): A Descriptive Qualitative Study

|                                 |                                                                                                                                                                                                                                                                                                                                                                                                                                                                                                                                                                                                                                                                                                                                                                                                                                                                                                                               |
|---------------------------------|-------------------------------------------------------------------------------------------------------------------------------------------------------------------------------------------------------------------------------------------------------------------------------------------------------------------------------------------------------------------------------------------------------------------------------------------------------------------------------------------------------------------------------------------------------------------------------------------------------------------------------------------------------------------------------------------------------------------------------------------------------------------------------------------------------------------------------------------------------------------------------------------------------------------------------|
| Journal:                        | <i>BMJ Open</i>                                                                                                                                                                                                                                                                                                                                                                                                                                                                                                                                                                                                                                                                                                                                                                                                                                                                                                               |
| Manuscript ID                   | bmjopen-2018-026257.R1                                                                                                                                                                                                                                                                                                                                                                                                                                                                                                                                                                                                                                                                                                                                                                                                                                                                                                        |
| Article Type:                   | Research                                                                                                                                                                                                                                                                                                                                                                                                                                                                                                                                                                                                                                                                                                                                                                                                                                                                                                                      |
| Date Submitted by the Author:   | 05-Mar-2019                                                                                                                                                                                                                                                                                                                                                                                                                                                                                                                                                                                                                                                                                                                                                                                                                                                                                                                   |
| Complete List of Authors:       | Ploeg, Jenny ; McMaster University, School of Nursing<br>Valaitis, Ruta; McMaster University School of Nursing<br>Cleghorn, Laura; McMaster University, Family Medicine; McMaster University<br>Yous, Marie-Lee; McMaster University School of Nursing,<br>Gaber, Jessica; McMaster University Faculty of Health Sciences, Family Medicine<br>Agarwal, Gina; McMaster University Department of Family Medicine<br>Kastner, Monika; North York General Hospital, Research and Innovation; University of Toronto, Institute of Health Policy, Management and Evaluation<br>Mangin, Dee; McMaster University, Family Medicine<br>Oliver, Doug; McMaster University Department of Family Medicine<br>Parascandalo, Fiona; McMaster University Department of Family Medicine<br>Risdon, Cathy; McMaster University, Family Medicine<br>Dolovich, Lisa; McMaster University/McMaster Innovation Park, Department of Family Medicine |
| <b>Primary Subject Heading</b>: | General practice / Family practice                                                                                                                                                                                                                                                                                                                                                                                                                                                                                                                                                                                                                                                                                                                                                                                                                                                                                            |
| Secondary Subject Heading:      | Health services research, Qualitative research                                                                                                                                                                                                                                                                                                                                                                                                                                                                                                                                                                                                                                                                                                                                                                                                                                                                                |
| Keywords:                       | OLDER ADULTS, PRIMARY CARE, INTERPROFESSIONAL TEAMS, GOAL-SETTING, QUALITATIVE RESEARCH                                                                                                                                                                                                                                                                                                                                                                                                                                                                                                                                                                                                                                                                                                                                                                                                                                       |
|                                 |                                                                                                                                                                                                                                                                                                                                                                                                                                                                                                                                                                                                                                                                                                                                                                                                                                                                                                                               |

SCHOLARONE™  
Manuscripts

1  
2  
3  
4  
5  
6  
7  
8  
9  
10  
11  
12  
13  
14  
15  
16  
17  
18  
19  
20  
21  
22  
23  
24  
25  
26  
27  
28  
29  
30  
31  
32  
33  
34  
35  
36  
37  
38  
39  
40  
41  
42  
43  
44  
45  
46  
47  
48  
49  
50  
51  
52  
53  
54  
55  
56  
57  
58  
59  
60

Research Article

**Title:** Perceptions of Older Adults in Ontario, Canada on the Implementation and Impact of a Primary Care Program, Health Teams Advancing Patient Experience: Strengthening Quality (Health TAPESTRY): A Descriptive Qualitative Study

**Running Title:** Perceptions of Older Adults of Health TAPESTRY

\* Jenny Ploeg, RN, PhD, Professor, School of Nursing, Scientific Director, Aging, Community and Health Research Unit, Faculty of Health Sciences and Associate Member, Department of Health, Aging and Society, McMaster University; 1280 Main Street West, Hamilton, ON L8S 4K1, Canada; phone: 905-525-9140 ext 22294; email: [ploegj@mcmaster.ca](mailto:ploegj@mcmaster.ca) \*Corresponding author

Ruta Valaitis, RN, PhD, Professor, School of Nursing, Scientific Director, Aging, Community and Health Research Unit, Faculty of Health Sciences and Associate Member, Department of Health, Aging and Society, McMaster University; 1280 Main Street West, Hamilton, ON L8S 4K1, Canada. Email: [valaitis@mcmaster.ca](mailto:valaitis@mcmaster.ca)

Laura Cleghorn, MA, Research Operations Coordinator, Department of Family Medicine, McMaster University, David Braley Health Sciences Centre, 100 Main Street West, 5<sup>th</sup> floor, Hamilton, ON L8P 1H6. Email: [cleghol@mcmaster.ca](mailto:cleghol@mcmaster.ca)

Marie-Lee Yous RN, MSc, PhD student, School of Nursing, McMaster University, 1280 Main Street West, Hamilton, ON L8S 4K1, Canada. Email: [yousm@mcmaster.ca](mailto:yousm@mcmaster.ca)

Jessica Gaber, MSW, RSW, Research Coordinator, Department of Family Medicine, McMaster University, David Braley Health Sciences Centre, 100 Main Street West, 5<sup>th</sup> floor, Hamilton, ON L8P 1H6. Email: [jgaber@mcmaster.ca](mailto:jgaber@mcmaster.ca)

Gina Agarwal, MBBS, PhD, MRCP, CCFP, FCFP, DFFP, Associate Professor, Department of Family Medicine, McMaster University, David Braley Health Sciences Centre, 100 Main Street West, 5<sup>th</sup> floor, Hamilton, ON L8P 1H6. Email: [agarg@mcmaster.ca](mailto:agarg@mcmaster.ca)

Monika Kastner, PhD, Research Chair, Knowledge Translation and Implementation, Research and Innovation, North York General Hospital, 4001 Leslie Street, Toronto, ON, M2K 1E1. Email: [monika.kastner@utoronto.ca](mailto:monika.kastner@utoronto.ca)

Derelie Mangin, MBChB, DPH, FRNZCGP, Professor, Associate Chair and Director, Research, Department of Family Medicine, McMaster University, David Braley Health Sciences Centre, 100 Main Street West, 5<sup>th</sup> floor, Hamilton, ON L8P 1H6. Email: [mangind@mcmaster.ca](mailto:mangind@mcmaster.ca)

Doug Oliver, BSc, MSc, MD, CCFP, Associate Professor, Department of Family Medicine, McMaster University, David Braley Health Sciences Centre, 100 Main Street West, 5<sup>th</sup> floor, Hamilton, ON L8P 1H6. Email: [dolive@mcmaster.ca](mailto:dolive@mcmaster.ca)

1  
2  
3  
4  
5  
6  
7  
8  
9  
10  
11  
12  
13  
14  
15  
16  
17  
18  
19  
20  
21  
22  
23  
24  
25  
26  
27  
28  
29  
30  
31  
32  
33  
34  
35  
36  
37  
38  
39  
40  
41  
42  
43  
44  
45  
46  
47  
48  
49  
50  
51  
52  
53  
54  
55  
56  
57  
58  
59  
60

Fiona Parascandalo, MA, MSc (candidate), Research Assistant, Department of Family Medicine, McMaster University, David Braley Health Sciences Centre, 100 Main Street West, 5<sup>th</sup> floor, Hamilton, ON L8P 1H6. Email: [parascf@mcmaster.ca](mailto:parascf@mcmaster.ca)

Cathy Risdon, MD, DMan, CCFP, FCFP, Professor and Vice Chair, Director of Health Services, Department of Family Medicine, McMaster University, David Braley Health Sciences Centre, 100 Main Street West, 5<sup>th</sup> floor, Hamilton, ON L8P 1H6. Email: [risdonc@mcmaster.ca](mailto:risdonc@mcmaster.ca)

Lisa Dolovich, BScPhm, PharmD, MSc, Professor, Department of Family Medicine, McMaster University, David Braley Health Sciences Centre, 100 Main Street West, 5<sup>th</sup> floor, Hamilton, ON L8P 1H6. email: [ldolovic@mcmaster.ca](mailto:ldolovic@mcmaster.ca)

**Word Count: 4,765**

Number of Tables: 5

Number of Figures: 0

**Keywords: older adults, primary care, interprofessional teams, goal-setting, qualitative research**

## ABSTRACT

**Objectives:** The aim of the study was to explore the perceptions of older adults on the implementation and impact of Health Teams Advancing Patient Experience: Strengthening Quality (Health TAPESTRY), a multi-component primary care program that seeks to improve care coordination for individuals through health-related goal-setting supported by trained lay volunteers who are an extension of an interprofessional team, and the use of technology to support communication among the team.

**Design:** This study used a qualitative descriptive design.

**Setting:** The setting for this study was two primary care practice sites located in a large urban area in Ontario, Canada.

**Participants:** The sample consisted of community-dwelling older adults aged 70 years and older. Participants were recruited from a convenience sample obtained from 360 clients who participated in the 12-month Health TAPESTRY randomized controlled trial.

**Methods:** Semi-structured interviews were conducted with 32 older adults either face-to-face or by telephone. Interviews were transcribed verbatim. Data were analysed using a constant comparative approach to develop themes.

**Results:** Older adults' perceptions about the Health TAPESTRY program included: (a) the lack of a clear purpose and understanding of how information was shared among providers, (b) mixed positive and negative perceptions of goal-setting and provider follow-up after in-home visits by volunteers, (c) positive impacts such as satisfaction with the primary care team, and (d) the potential for the program to become a regular program and applied to other communities and groups.

1  
2  
3 **Conclusions:** Older adults living in the community may benefit from greater primary care  
4 supports provided through enhanced team-based approaches. Programs such as Health  
5 TAPESTRY facilitate opportunities for older adults to work with primary care providers to meet  
6 their self-identified needs. By exploring perceptions of clients, primary care programs can be  
7 further refined and expanded for various populations.  
8  
9  
10  
11  
12  
13

## 14 **ARTICLE SUMMARY**

### 15 **Strengths and limitations of this study**

- 16 • The study included community-dwelling older adults with a variety of health conditions.
- 17 • A rigorous analytic method was used involving multiple researchers with expertise in  
18 primary care, qualitative, and aging research as well as program evaluation.
- 19 • Study limitations were that most of the participants self-identified as Caucasian and only  
20 English-speaking older adults were interviewed.
- 21 • Only two practice sites from a Family Health Team in one area of Ontario, Canada were  
22 included in this study.  
23  
24  
25  
26  
27  
28  
29  
30  
31  
32  
33  
34  
35  
36  
37  
38  
39  
40  
41  
42  
43  
44  
45  
46  
47  
48  
49  
50  
51  
52  
53  
54  
55  
56  
57  
58  
59  
60

## INTRODUCTION

Since the early 2000's, the province of Ontario in Canada has implemented reforms to improve access to primary care services and chronic disease management, target health promotion and disease prevention, implement interdisciplinary teams, and increase coordination between primary care and other services.<sup>1</sup> Previous studies have explored the impact of interprofessional primary care teams for older adults with complex needs.<sup>2,3</sup> However, few studies describe the experiences and perspectives of clients in relation to innovative primary care models that use this approach.<sup>4</sup>

Efforts to improve the quality of healthcare have increasingly focused on the 'triple aim' of improving individual experience of care, improving population health, and reducing costs.<sup>5</sup> Focusing on clients' experiences provides clear guidance for quality improvement of programs, enhances client safety, improves compliance with treatment plans, and promotes the use of preventative care services.<sup>6,7</sup> It can also provide insight into what is lacking in community programs and how to efficiently use healthcare system resources to better meet clients' needs.<sup>7</sup> Client engagement in program planning and improvement ensures that programs are directly applicable to clients and can maximize the transferability of innovations into clinical practice.<sup>8,9</sup>

There is a positive association between stronger primary care systems and better population health and longevity.<sup>10-13</sup> The core primary care attributes underpinning this effect include first contact care, person-centred-care, continuity, comprehensiveness, and coordination.<sup>14</sup> This evidence is congruent with endeavours to place client-centred, coordinated care at the forefront of efforts to improve primary care.<sup>15</sup> Person-centred care ensures that healthcare consumers are being acknowledged as capable human beings and that their preferences, needs, and values are respected.<sup>16</sup> This paper reports on the experiences of older

1  
2  
3 adults who participated in a new multi-component program designed to improve person-centred,  
4  
5 team-based primary care.  
6

### 7 **Health TAPESTRY**

8  
9  
10 Health Teams Advancing Patient Experience: Strengthening Quality (Health  
11  
12 TAPESTRY) is an innovative primary care program improving care coordination for clients,  
13  
14 centred on their health goals and needs, while optimizing aging.<sup>15</sup> Person-centred approaches  
15  
16 address common issues affecting older adults' health. Multiple components are involved  
17  
18 including in-home visits with trained volunteers, technology-based applications (e.g., TAP-App  
19  
20 and an electronic personal health record (PHR)), increased accessibility and involvement of  
21  
22 interprofessional primary care teams, and integration of community resources.<sup>15</sup>  
23  
24  
25

26 In-home visits were conducted by pairs of volunteers, typically an older individual and a  
27  
28 younger university student. They received training on how to engage with older adults with  
29  
30 complex health needs and helped them to set their personal health and life goals. A feasibility  
31  
32 sub-study of the goal-setting process in the Health TAPESTRY program found it to be feasible  
33  
34 and supported interprofessional teams to help improve care management of older adults.<sup>17</sup> They  
35  
36 collected information for the primary care teams using the 'TAP-App' on tablet computers.  
37  
38 Information collected about the client's health risks, needs, and goals was summarized in an  
39  
40 electronic report which was transferred to their primary care electronic medical record.<sup>18</sup> The  
41  
42 interdisciplinary team reviewed the report and followed-up on goals by developing a plan of care  
43  
44 to address identified health risks and goals. Clients were also provided with access to their PHR  
45  
46 so that they could track their own medical information within health modules (e.g. medication  
47  
48 tracker and immunization record) and have increased access to their primary care team through  
49  
50 secure messaging.<sup>17</sup> Common gaps in care were identified from the aggregate information  
51  
52  
53  
54  
55  
56  
57

1  
2  
3 collected during volunteer home visits. These gaps were addressed for clients during group  
4 education visits known as the Healthy Aging Series offered to clients and their friends and  
5 family.<sup>19</sup> Topics covered included an overview of healthy aging, nutrition, physical activity, and  
6  
7  
8 advance care planning.  
9  
10

11  
12 We report on qualitative findings obtained from older adults who were recruited for a  
13 large, mixed-methods, randomized controlled trial (RCT) that examined the effectiveness of the  
14 Health TAPESTRY intervention.<sup>15</sup> Results of the RCT are forthcoming in a paper focused on  
15 patient outcomes. Findings from the RCT for clients who received Health TAPESTRY compared  
16 to the control group were the following: (a) no significant difference in goal attainment scaling,  
17  
18 (b) an increase in the number of primary care visits (mean 4.9 versus 3.5;  $p < 0.0001$ ), and (c)  
19 reduced odds of experiencing one or more hospitalizations during the 6 month intervention  
20 period (odds ratio [OR] 0.44 (95% CI 0.2 , 0.95). The triple aim for health care system  
21 improvement includes a focus on 'patient experience'.<sup>5</sup> To further understand the patient  
22 experience and perceived outcomes, this paper aims to explore the perceptions of older adults  
23 who received the Health TAPESTRY program. The research question was: What are the  
24 perceptions of older adults who received the Health TAPESTRY program in relation to: (a)  
25 program goals, (b) experiences in the program, (c) impact, and (d) its sustainability and  
26 scalability potential?  
27  
28  
29  
30  
31  
32  
33  
34  
35  
36  
37  
38  
39  
40  
41  
42  
43

## 44 **METHODS**

### 45 **Study design**

46  
47 We used a qualitative description approach.<sup>20 21</sup> This approach was suitable in providing  
48 an in-depth description of patient experiences in the program.<sup>20 21</sup>  
49  
50  
51  
52  
53

### 54 **Sample**

1  
2  
3 The sample included older adults who were: (a) patients from the McMaster Family  
4 Health Team, (b) aged 70 years or older, (c) living in the community in Southern Ontario,  
5  
6 Canada, and (d) allocated to the Health TAPESTRY program. Convenience sampling was used  
7  
8 to seek clients who participated in the Health TAPESTRY program. Clients were excluded if  
9  
10 they: (a) were living in long-term care facilities, (b) expected to be out of Canada for more than  
11  
12 50% of the study duration, (c) were palliative or receiving end-of-life care, or (d) did not speak  
13  
14 English.  
15  
16  
17  
18

### 19 **Setting**

20  
21 The study was conducted in two primary care clinic sites of the Family Health Team  
22  
23 located in a large urban area within Southern Ontario, Canada. These sites provide services to  
24  
25 over 36,000 patients within the region who are followed-up by 37 family physicians. The teams  
26  
27 are composed of family physicians, medical residents, nurses, nurse practitioners, pharmacists,  
28  
29 and various allied health professionals.  
30  
31  
32

### 33 **Recruitment**

34  
35 Research team members purposively sampled two groups of clients who completed the  
36  
37 Health TAPESTRY program and invited them to take part in an interview. One group consisted  
38  
39 of clients who were the first to be recruited in the RCT. The second group consisted of clients  
40  
41 who were recruited near the end of the RCT. This approach captured diverse perspectives and  
42  
43 minimized the influence that confidence levels of team members had over the clients'  
44  
45 perspectives as they gained experience in delivering the intervention. In total, 129 clients were  
46  
47 approached, 83 agreed to participate and 32 were recruited. Some research team members had  
48  
49 prior contact with participants from the evaluation of the Health TAPESTRY program. This  
50  
51 recruitment strategy was later modified to ensure we obtained a more diverse sample of older  
52  
53  
54  
55  
56  
57  
58  
59  
60

adults based on gender, age [70 years and greater], and number of “alerts” [five or more “alerts”] generated from the Health TAPESTRY program in-home assessment such as: inadequate physical activity, risk for poor nutrition, and urinary incontinence.

### Data collection

Semi-structured individual interviews were conducted face-to-face at the university or by telephone from September 2015 to March 2016 at six-months post-enrolment in the RCT. The interview guide was developed through a literature review of primary care interventions and older adults with feedback from research team members and was pilot tested with three clients (See Table 1). Interviews were conducted by five research team members (MB, LC, NF, JG, FP) and took 40 minutes to complete. No interviews were repeated. Interviews continued until data saturation was reached (i.e. no new themes emerged).

**Table 1.** Interview guide for older adults participating in Health TAPESTRY

|                                                                                                                                                                                                                                                                                                                                                                                                                                                                                                                                                                                                                                                                                                                                                                                                                                                                                                                                                                                                                                                                                                                        |
|------------------------------------------------------------------------------------------------------------------------------------------------------------------------------------------------------------------------------------------------------------------------------------------------------------------------------------------------------------------------------------------------------------------------------------------------------------------------------------------------------------------------------------------------------------------------------------------------------------------------------------------------------------------------------------------------------------------------------------------------------------------------------------------------------------------------------------------------------------------------------------------------------------------------------------------------------------------------------------------------------------------------------------------------------------------------------------------------------------------------|
| <p><b>Overall Understanding of Health TAPESTRY</b></p> <ol style="list-style-type: none"> <li>1) How would you describe the Health TAPESTRY program to others? What is its main purpose?</li> <li>2) What do you think are the benefits of Health TAPESTRY?</li> </ol>                                                                                                                                                                                                                                                                                                                                                                                                                                                                                                                                                                                                                                                                                                                                                                                                                                                 |
| <p><b>Implementation of Health TAPESTRY</b></p> <ol style="list-style-type: none"> <li>1) Can you tell me about your experiences of:           <ol style="list-style-type: none"> <li>a) getting signed up for Health TAPESTRY?</li> <li>b) the process of scheduling your first volunteer visit?</li> <li>c) receiving your first in-home volunteer visit?</li> <li>d) completing various health-related surveys with volunteers?</li> <li>e) setting up goals?</li> <li>f) being introduced to the electronic personal health record by volunteers?</li> <li>g) receiving follow-up from a family physician or the interprofessional team (e.g. dietitian, pharmacist, occupational therapist, etc.) at the clinic based on the report sent to them by the volunteers?</li> </ol> </li> <li>2) How has the Health TAPESTRY program affected your experiences communicating and working with members of your healthcare team?</li> <li>3) As a result of Health TAPESTRY, were you linked or referred to any community programs or services such as home support or community groups? If so, tell me about</li> </ol> |

your experiences with these programs or services.

- 4) How would you describe how your care was coordinated over the last six months?
- 5) How did Health TAPESTRY help you to meet your life and health goals?
- 6) What risks or challenges might exist from participating in Health TAPESTRY for you or other participants?

### **Sustainability and Scalability**

- 1) Based on your experiences, do you think Health TAPESTRY could be a regular program?
- 2) How do you see Health TAPESTRY being delivered or offered to older adults or other populations in Ontario or Canada?
- 3) Do you think Health TAPESTRY is ready to be spread elsewhere? Why or why not and what is needed to get there.

### **Data analysis**

Interviews were audio-taped, transcribed verbatim and then transcripts were coded independently by RV, LC, NF, FP, and JG. NVivo Version 10 was used to organize data.<sup>22</sup> Initially, a coding framework was created by LC and RV and was refined by transforming codes into themes. The refined framework was shared with the larger research team for review and feedback. Monthly research team meetings were held during data analysis to clarify themes. Data were analysed using the constant comparative approach.<sup>23</sup> To identify differences in perceptions by clients across the two practice sites (Site A and Site B), we conducted matrix queries in NVivo 10.<sup>22</sup> Themes were identified by staying true to the words of the participants and developing themes by describing participants' responses. Verbal counting was conducted to reveal how many participants brought up a theme.<sup>24</sup> When the terms *most* or *many* are used this means that 75% or more of participants discussed a theme, "half" means about 50% of participants discussed a theme, and "some" or "few" means that 20% or less discussed a theme.

### **Rigour and trustworthiness**

1  
2  
3 Consolidated criteria for reporting qualitative research (COREQ) were used to report  
4 findings.<sup>25</sup> To increase the rigour and trustworthiness of findings, we used Lincoln and Guba's  
5 (1985) validation criteria (credibility, transferability, dependability, and confirmability).<sup>26</sup> To  
6 establish credibility, we used investigator triangulation by including researchers who brought  
7 different perspectives and experiences to data analysis, including gerontology, qualitative  
8 research, and primary care. To increase the transferability of findings, rich, thick descriptions  
9 were used to describe the study sample and setting.<sup>27</sup> Dependability and confirmability were  
10 considered by clearly documenting the research process and maintaining an audit trail.<sup>26</sup>

### 21 **Patient and public involvement**

22  
23  
24 Health TAPESTRY was designed by key stakeholders including patients, caregivers,  
25 providers, volunteers, and community service agency staff.<sup>28</sup> The program was designed by  
26 stakeholders using small group sessions that included discussing and analysing 13 persona-  
27 scenario exercises. The persona-scenario exercise consists of a structured approach where group  
28 members create a fictitious character and find solutions to address a problem.<sup>28</sup> The research  
29 questions and outcome measures were determined by the stakeholders' priorities, preferences,  
30 and experiences. The patients were not involved in the recruitment to and conduct of the study.  
31 The results of the study will be shared with participants by providing them with a lay language  
32 version description of the study and results following the publication of the trial. The burden of  
33 the intervention was assessed by patients themselves as they helped to design the program.

### 46 **Ethical considerations**

47  
48  
49 Ethics approval was obtained from the Hamilton Integrated Research Ethics Board  
50 (Project #14-726). Each participant provided written informed consent prior to being  
51 interviewed. Participants received a \$25 CAD gift card as a token of appreciation.  
52  
53  
54  
55  
56  
57

## RESULTS

### Demographic characteristics

A total of 32 older adults participated in this study with a mean age of 78.7 years (SD=6.1) (See Table 2). Half of the participants were female (50%) and most were married or had common law partners (68%). Most participants were Caucasian (96%) and had completed post-secondary or higher education (58%). Most participants had two or more chronic conditions (67%).

**Table 2.** Demographic characteristics of participants (N=32)

| Characteristics                                  | n (%)      |
|--------------------------------------------------|------------|
| Gender                                           |            |
| Female                                           | 16 (50.0%) |
| Male                                             | 16 (50.0%) |
| Age (years), mean (SD)                           | 78.7 (6.1) |
| Age range                                        |            |
| 70-79                                            | 19 (59.0%) |
| 80 and above                                     | 13 (41.0%) |
| Highest level of education, n=31                 |            |
| High school                                      | 11 (35.5%) |
| University (undergraduate)                       | 5 (16.1%)  |
| College diploma                                  | 4 (12.9%)  |
| Professional degree (nursing, teachers' college) | 4 (12.9%)  |
| Master's                                         | 3 (9.7%)   |
| Elementary                                       | 2 (6.5%)   |
| PhD                                              | 2 (6.5%)   |
| Country of birth:                                |            |
| Canada                                           | 19 (59.4%) |
| UK                                               | 6 (18.8%)  |
| Europe                                           | 5 (15.6%)  |
| Asia                                             | 2 (6.3%)   |
| Caucasian/White Ethnicity, n=24                  | 23 (95.8%) |
| Language Spoken: English                         | 32 (100%)  |
| Marital status, n=31                             |            |
| Married or Common law                            | 21 (67.7%) |
| Widowed/divorced/separated/single/never married  | 10 (32.3%) |
| Total number of chronic conditions ++, n=27      |            |
| 1 chronic condition                              | 9 (33.3%)  |
| 2 or more chronic conditions                     | 18 (66.6%) |

|                                                |            |
|------------------------------------------------|------------|
| Chronic conditions/diseases n (%) <sup>2</sup> |            |
| Diabetes, n=26                                 | 9 (34.6%)  |
| Heart disease+, n=27                           | 9 (33.3%)  |
| Cancer, n=26                                   | 7 (26.9%)  |
| Osteoarthritis, n=26                           | 6 (23.1%)  |
| Hypertension, n=25                             | 7 (21.9%)  |
| COPD/Lung disease, n=25                        | 5 (20.0%)  |
| Stroke/Cerebrovascular disease, n=26           | 4 (15.4%)  |
| <b>Implementation site</b>                     |            |
| Site A                                         | 20 (62.5%) |
| Site B                                         | 12 (37.5%) |

Note. SD = Standard Deviation, COPD = Chronic Obstructive Pulmonary Disorder  
 N = total sample, n = number of participants who provided data  
 + arteriosclerosis, angina pectoris, and heart failure  
 ++ based on conditions listed above

## Categories

Themes describing older adults' perceptions of the Health TAPESTRY program are organized under four overarching categories including: (a) program goals, (b) experiences, (c) perceived impact, and (d) program sustainability and scalability. Each theme is described below. Differences in perceptions by clients in site A and B are noted only where they exist. Tables 3 to 5 provide an overview of the categories, related themes, and participant quotations to support them.

### 1. Program Goals

One theme that emerged was a lack of clarity about the program's purpose and sharing of information as most participants were unsure about Health TAPESTRY's goals and the process for sharing information with providers. Other themes indicate that participants perceived that the main goals of the program were to: (a) obtain a comprehensive assessment of clients, (b) support older adults to live at home, and (c) improve care processes for healthy aging (See Table 3).

*Lack of clarity about the program's purpose and sharing of information: "I don't really know"*

Most participants (more from Site B than Site A) were unclear about the purpose of

1  
2  
3 Health TAPESTRY and how their information was made available to providers. They perceived  
4 that researchers were simply collecting research data without clinical follow-up to provide  
5 concrete recommendations to improve their health. Participants reported that the collection of  
6 their data and the benefit of this activity was unknown to them. They felt unsure about the  
7 process that was used to collect their health information and pass on information to physicians. A  
8 few participants felt that the program may have been more helpful for the researchers than for  
9 older adults.

10  
11  
12  
13  
14  
15  
16  
17  
18  
19 *Obtain a comprehensive assessment of clients: “acquire as much information as possible”*

20  
21  
22 Participants perceived that one of the goals of Health TAPESTRY was for providers to  
23 collect information about their current health status, medical and social history, and lifestyle.  
24 Some participants felt that obtaining a comprehensive health assessment of older adults and  
25 providing their health information to providers ensured that their information can be shared with  
26 multiple providers. This resulted in saved time for practitioners. The program was also perceived  
27 as helping clinicians gain a broader understanding of the challenges that older adults face as they  
28 age.  
29  
30  
31  
32  
33  
34  
35  
36

37  
38 *Support older adults to live at home: “keep people healthy”*

39  
40 Some participants perceived that another of Health TAPESTRY’s goals was to ensure  
41 that older adults had their health and social care needs met so they could continue to live at  
42 home. They felt the program aimed to help them understand how to access health and social care  
43 services. Participants remarked that Health TAPESTRY aimed to develop strategies to improve  
44 how older adults live at home by first understanding their current health status and lifestyle.  
45  
46  
47  
48  
49  
50

51  
52 *Improve care processes for healthy aging: “see if it’s working and where they can improve”*

53  
54 Some participants indicated that a goal of Health TAPESTRY was to improve general  
55  
56  
57

health and well-being by understanding the everyday life of older adults. Participants felt that the program encouraged providers to explore where the gaps in health screening lie and come up with approaches to improve them. The program was perceived to explore various issues that impact the health of older adults at multiple levels (e.g., emotionally, physically, and intellectually) to be able to develop better plans of care.

**Table 3. Themes and sample participant quotes for program goals**

| Category             | Themes                                                                                                                                                                                                                                                                                                                                                                                                                                                                                                                                                                                                                                                                                                                                                                                                                                                                                                                                                                                                                                                                                                                                                                                                                                                                                                                                                                                                                                                                                                                                                                                                                                                                                                                                                                                                                                                                                                                                                                                                                                                                                                                                                         |
|----------------------|----------------------------------------------------------------------------------------------------------------------------------------------------------------------------------------------------------------------------------------------------------------------------------------------------------------------------------------------------------------------------------------------------------------------------------------------------------------------------------------------------------------------------------------------------------------------------------------------------------------------------------------------------------------------------------------------------------------------------------------------------------------------------------------------------------------------------------------------------------------------------------------------------------------------------------------------------------------------------------------------------------------------------------------------------------------------------------------------------------------------------------------------------------------------------------------------------------------------------------------------------------------------------------------------------------------------------------------------------------------------------------------------------------------------------------------------------------------------------------------------------------------------------------------------------------------------------------------------------------------------------------------------------------------------------------------------------------------------------------------------------------------------------------------------------------------------------------------------------------------------------------------------------------------------------------------------------------------------------------------------------------------------------------------------------------------------------------------------------------------------------------------------------------------|
| <b>Program goals</b> | <p data-bbox="354 667 1409 743"><b>Lack of clarity about the program’s purpose and sharing of information: “I don’t really know”</b></p> <p data-bbox="354 779 1409 961"><i>I was always waiting for a purpose...the reason why you are doing this research, and really I never get the answer... And research, in my mind, it’s when you are taking data, data, data, data and then you will come back to certain suggestions or a certain way or recommendation what I should do or what I will do...but it never came to that (R-106).</i></p> <p data-bbox="354 997 1409 1142"><i>Well, my understanding it’s for some kind of a program or a record...that maybe you want to compare with other people...I don’t know how specific it is to me, or is it a group thing or a widespread thing...And it may have been more help to your end than my end, to be honest (R-29).</i></p> <p data-bbox="354 1178 1409 1253"><i>Well, I don’t really know [how information from the home visit is shared.] I just figure you put it in the computer and I really don’t know. (R-30)</i></p> <p data-bbox="354 1289 1409 1365"><b>Obtain a comprehensive assessment of clients: “acquire as much information as possible”</b></p> <p data-bbox="354 1400 1409 1545"><i>... there will be a central data bank for me that will allow practitioners and professionals to access that file, which could save them hours and hours of doing the same research over and over again [...] they have available to them all of the information on me, my whole DNA, if I can call it that... (R-36).</i></p> <p data-bbox="354 1581 1409 1692"><i>...an attempt to acquire as much information as possible about senior citizens, their lifestyles, their diet, health and everything that one encounters as you approach old age (R-48).</i></p> <p data-bbox="354 1728 1409 1766"><b>Support older adults to live at home: “keep people healthy”</b></p> <p data-bbox="354 1801 1409 1873"><i>...the purpose of TAPESTRY, to make sure that people that are at home are being looked after properly and getting the proper care and know where they can get the</i></p> |

proper care (R-270).

...the goal is to keep people healthy, keep them out of the hospital, nursing homes...but that's a big job (R-03).

**Improve care processes for healthy aging: “see if it’s working and where they can improve”**

...to try and fill in holes or see if it’s working and where they can improve to help to take care of seniors that we, perhaps, made me feel I was important (R-145).

...you’re going to come to certain conclusions; with the ultimate goal of being able to identify all the various issues that an aging person experiences and then being able to sort of put the theory into practice in your treatment of the elderly (R-114).

...I guess it [Health TAPESTRY] really was sort of encompassing the life of a senior or somebody coping with difficulties, but managing (R-118).

## 2. Experiences with Health TAPESTRY

Five themes were identified that describe the category client experiences with Health TAPESTRY: (a) variable personal benefit from goal-setting, (b) open and caring in-home visits by trained volunteers, (c) mixed experiences with provider follow-up after volunteer visits, (d) satisfaction with the Healthy Aging Series and (e) challenges with PHR technology (See Table 4)

### *Variable personal benefit from goal-setting*

About half of the participants felt that they benefitted from Health TAPESTRY’s goal-setting and that it encouraged them to plan ahead. Participants were encouraged to take initiative in planning their own health and take better care of themselves by setting achievable goals, which were often related to improving diet and exercise habits. The other half of the participants reported few benefits from goal setting. Some felt that goals were irrelevant at their age and health conditions impacted their ability and need to set goals. Some participants reported frequently changing their goals, often due to their changing health status, therefore leading to unmet goals.

1  
2  
3 *Open and caring in-home visits by trained volunteers*  
4

5 Many participants, mostly from site A, enjoyed receiving Health TAPESTRY home  
6 visits, stating they were convenient, relaxing, stimulating, and encouraged social interaction.  
7  
8 Volunteers listened and were personable, caring and empathetic. Participants felt comfortable  
9  
10 disclosing personal information to volunteers within their home environment and felt privileged  
11  
12 to receive one-on-one attention and enough time to discuss their health in detail. They felt that  
13  
14 scheduling of visits was flexible to meet their needs and they did not need to worry about  
15  
16 transportation. None of the participants stated that they would have rather received home visits  
17  
18 by healthcare professionals. Some participants felt that volunteers had different levels of  
19  
20 knowledge and confidence in discussing health issues.  
21  
22  
23  
24  
25

26 *Mixed experiences with provider follow-up after volunteer visits*  
27

28 Participants reported mixed experiences with primary care provider follow-up after  
29  
30 volunteer visits for Health TAPESTRY. About half of the participants felt that receiving follow-  
31  
32 up with clinicians related to issues identified during home visits worked well. Clients perceived  
33  
34 that appointments were quickly booked and healthcare providers took initiative in following-up  
35  
36 on reported issues of clients. The process of collection and reviewing health information, from  
37  
38 volunteer to healthcare team to specialist referral, made them feel that their well-being was  
39  
40 important.  
41  
42  
43

44 About half of the participants perceived that there was limited or inadequate provider  
45  
46 follow-up of issues identified during in-home visits with volunteers. Some participants explained  
47  
48 that they expected to be contacted by primary care providers after home visits or referred for  
49  
50 tests or other services, but this did not happen. A few participants were not interested in  
51  
52 receiving following-up and felt confident in managing their own health independently.  
53  
54  
55  
56  
57

### *Satisfaction with the Healthy Aging Series*

Participants were very satisfied with the Healthy Aging Series. The series was seen as interactive, educational, and addressed a range of topics (e.g., falls, exercise, nutrition, advanced care planning). Participants enjoyed learning from other older adults who shared their life experiences.

### *Challenges with PHR technology*

Approximately half of the participants experienced challenges when attempting to access their PHR. Some older adults reported having issues with their computers and were therefore not able to access their PHR. Some participants preferred not to create a PHR account as they favoured having hard copies of their information instead.

**Table 4. Themes and sample participant quotes for experiences with Health TAPESTRY**

| Category                                | Themes                                                                                                                                                                                                                                                                                                                                                                                                                                                                                                                                                                                                                                                                                                                                                                                                                                                                                                                                                                                                                                                                                                                                                                                                                                                                                                                                                                                                                                      |
|-----------------------------------------|---------------------------------------------------------------------------------------------------------------------------------------------------------------------------------------------------------------------------------------------------------------------------------------------------------------------------------------------------------------------------------------------------------------------------------------------------------------------------------------------------------------------------------------------------------------------------------------------------------------------------------------------------------------------------------------------------------------------------------------------------------------------------------------------------------------------------------------------------------------------------------------------------------------------------------------------------------------------------------------------------------------------------------------------------------------------------------------------------------------------------------------------------------------------------------------------------------------------------------------------------------------------------------------------------------------------------------------------------------------------------------------------------------------------------------------------|
| <b>Experiences with Health TAPESTRY</b> | <p data-bbox="402 1039 1425 1073"><b>Variable personal benefit from goal-setting</b></p> <p data-bbox="402 1108 1425 1220"><i>...the goals were good because they jogged me to think...when you know you have got a finite piece of life left, it's probably a good idea to plan what you are going to do with it as well (R-118).</i></p> <p data-bbox="402 1262 1425 1398"><i>...I think I'm too old to get those goals; because it was about exercising, right, and about walking. Well, I still don't walk that much because my back is so sore...Then I had an operation on my foot...So, you know, I do as good as I can (R-148).</i></p> <p data-bbox="402 1440 1425 1577"><i>Well, I just, for me it just wasn't relevant. I mean, I joked and said, 'well my goal is to be able to get up in the morning and function'; but I was, you know, being a bit facetious because at the time I wasn't feeling very well and it was sometimes very hard to just get out of bed (R-15)</i></p> <p data-bbox="402 1619 1425 1652"><b>Open and caring in-home visits by trained volunteers</b></p> <p data-bbox="402 1694 1425 1766"><i>...they [volunteers] explained everything and they interacted a lot; there was a lot of social interaction, so it was very good (R-118).</i></p> <p data-bbox="402 1808 1425 1871"><i>They were all very personable and attentive, caring, and listening with good listening skills (R-105).</i></p> |

### **Mixed experiences with provider follow-up after volunteer visits**

*...TAPESTRY sends in volunteers to assist the patient or the client; and depending on what their needs might be, they send in a specialist that might be of assistance...Myself I had an appointment with the doctor and the pharmacist to go over my drugs and that was very helpful (R-105).*

*I found it very helpful in that as a result of the personal interview I got some feedback from my doctor, I don't know, I won't say immediately, but almost; ...and she requested me to go into the office for a visit as a result of the TAPESTRY program (R-146).*

*They [clinicians] certainly don't contact me and say, well we received this from the TAPESTRY program or whatever and we're wondering if you could come in and talk to us...But none of that has happened; so I feel there's a disconnect...between the clinic and this program (R-15).*

### **Satisfaction with the Healthy Aging Series**

*Very well done...one of the best sort of seminars I've been to in a long, long time...They didn't talk down to you, they asked you questions (R-99).*

*The information was fabulous. I was just blown away with the clients that came, they were so knowledgeable and so articulate and very attuned to the whole health issues (R-100).*

### **Challenges with PHR technology**

*My computer has been down for about a month...and I think there's also a problem with my technology, it's probably pretty old. So I never was able to really access that [PHR] (R-105).*

## **3. Perceived impact of Health TAPESTRY**

Three themes denote clients' perceived impact of Health TAPESTRY. Half of the participants felt that Health TAPESTRY resulted in small or no difference in their lives. Positive impacts perceived by some participants were: (a) satisfaction with the primary care team and healthcare system and (b) change in health behaviours or ways of thinking (See Table 5).

*Small or no difference in the lives of clients*

1  
2  
3 More participants from site B than from site A felt that the program resulted in little to no  
4 change in their lives. These participants explained that Health TAPESTRY did not result in  
5 lifestyle changes but in some cases, made them aware of healthy lifestyle choices. Some felt that  
6 they were already aware of available community services.  
7  
8  
9

### 10 *Satisfaction with the primary care team and healthcare system*

11  
12 Some participants, relatively more from Site B, described satisfaction and confidence  
13 with the primary care team and healthcare system as a result of the program. Participants in  
14 general attributed faster follow-up of health-related issues to Health TAPESTRY versus usual  
15 care and indicated that the program ensured that they received test results. Participants felt that  
16 the program increased collaboration between older adults and providers and ensured they  
17 participated in managing their own health. The program also increased client satisfaction by  
18 connecting them to community programs such as exercise classes and providing suggestions to  
19 improve their daily functioning.  
20  
21  
22  
23  
24  
25  
26  
27  
28  
29  
30  
31  
32

33 Health TAPESTRY was perceived as filling existing gaps in primary healthcare by  
34 complementing the practice of physicians and offering informative health-related seminars.  
35 Family physicians were perceived by participants as having to fulfil many responsibilities in  
36 usual care. Health TAPESTRY was therefore seen as an efficient approach for physicians to  
37 understand how clients live at home and their care needs through lay volunteers' reports.  
38  
39  
40  
41  
42  
43

### 44 *Change in health behaviours or ways of thinking*

45  
46 About one third of participants felt that Health TAPESTRY resulted in a positive change  
47 in health behaviours such as improved diet and increased physical activity. Clients felt better  
48 prepared to discuss their health with providers. Some participants felt they had a more positive  
49 attitude towards their health and were optimistic about improving it. Having meaningful  
50  
51  
52  
53  
54  
55  
56  
57

1  
2  
3 interactions with volunteers made participants more aware of potential health issues associated  
4  
5 with aging.  
6

#### 7 8 **4. Sustainability and scalability of Health TAPESTRY** 9

10 Participants provided insight into the category sustainability and scalability of Health  
11 TAPESTRY. Themes that emerged were: (a) the program “could and should be a regular  
12 program”, (b) the program may be relevant for different communities and populations, and (c)  
13 barriers to program sustainability exist.  
14  
15  
16  
17

18  
19 *The program “could and should be a regular program”*  
20

21 Health TAPESTRY was perceived by some participants to be sustainable and could be  
22 part of a regular program offered through family practices. Participants perceived that the  
23 program could be helpful for the prevention of disease and poor outcomes frequently  
24 encountered by older adults.  
25  
26  
27  
28  
29

30  
31 *The program may be relevant for different communities and populations*  
32

33 Most participants felt that Health TAPESTRY could be helpful for various communities  
34 and populations throughout Canada. Participants explained that particular communities and  
35 populations had the potential to benefit from the program such as clients living in rural and  
36 isolated communities, younger clients, clients confined to their homes, and Indigenous  
37 communities.  
38  
39  
40  
41  
42  
43

44  
45 *Barriers to maintaining the program exist*  
46

47 About half of the participants reported barriers to sustainability of Health TAPESTRY.  
48 They perceived that the availability of staff and salary costs of providers to maintain the program  
49 could negatively impact sustainability. Participants identified public perceptions that the  
50 healthcare system is focused on cost-efficiency and that essential programs may not necessarily  
51  
52  
53  
54  
55  
56  
57

be funded due to high costs. They also reported that it may be challenging to increase awareness of the program to new users.

**Table 5. Themes and sample participant quotes for impact, sustainability, and scalability**

| Category                                     | Themes                                                                                                                                                                                                                                                                                                                                                                                                                                                                                                                                                                                                                                                                                                                                                                                                                                                                                                                                                                                                                                                                                                                                                                                                                                                                                                                                                                                                                                                                                                                                                                                                                                                                                                                                                                                                                                                         |
|----------------------------------------------|----------------------------------------------------------------------------------------------------------------------------------------------------------------------------------------------------------------------------------------------------------------------------------------------------------------------------------------------------------------------------------------------------------------------------------------------------------------------------------------------------------------------------------------------------------------------------------------------------------------------------------------------------------------------------------------------------------------------------------------------------------------------------------------------------------------------------------------------------------------------------------------------------------------------------------------------------------------------------------------------------------------------------------------------------------------------------------------------------------------------------------------------------------------------------------------------------------------------------------------------------------------------------------------------------------------------------------------------------------------------------------------------------------------------------------------------------------------------------------------------------------------------------------------------------------------------------------------------------------------------------------------------------------------------------------------------------------------------------------------------------------------------------------------------------------------------------------------------------------------|
| <p><b>Perceived impact</b></p>               | <p><b>Small or no difference in the lives of clients</b></p> <p><i>I guess [Health TAPESTRY] just makes me more and more aware, I think, of what I am doing. I didn't make any particular or specific changes to the way I live or eat or do anything (R-172).</i></p> <p><i>I don't think there's anything that TAPESTRY said or did that made any changes that I can see, no (R-30).</i></p> <p><b>Satisfaction with the primary care team and healthcare system</b></p> <p><i>...I am happy that I did join with TAPESTRY, because it really speeded up my [care]– and hopefully this second problem what I have here with that hand, if that can be speeded up somehow to get the results, then I am happy with the practice of TAPESTRY (R-106).</i></p> <p><i>Well, I'm pretty sure that whatever connection you had with the clinic did promote a few points in my favour. And even my pharmacist, he even got word from the clinic that things were changing for my prescriptions. So, they were acting on the advice that you gave them (R-250).</i></p> <p><i>...I would also find that there are areas that the doctor can't possibly cover and TAPESTRY is certainly making an attempt to cover all facets of the healthcare system, particularly through the Healthy Aging Series (R-146).</i></p> <p><b>Change in health behaviours or ways of thinking</b></p> <p><i>...I wasn't walking before that. I wouldn't walk farther than my nose. But now I've started walking, and even as I say, some days when I don't feel it, now I say, go do it (R-129).</i></p> <p><i>...the TAPESTRY program improved my knowledge of what my own health was about and it helped me to be more prepared...going into a doctor's appointment or whoever I am talking with...to be able to discuss and understand what I have to do to improve (R-75).</i></p> |
| <p><b>Sustainability and scalability</b></p> | <p><b>The program “could and should be a regular program”</b></p> <p><i>It should be [Health TAPESTRY should be a regular program]...because they</i></p>                                                                                                                                                                                                                                                                                                                                                                                                                                                                                                                                                                                                                                                                                                                                                                                                                                                                                                                                                                                                                                                                                                                                                                                                                                                                                                                                                                                                                                                                                                                                                                                                                                                                                                      |

1  
2  
3  
4  
5  
6  
7  
8  
9  
10  
11  
12  
13  
14  
15  
16  
17  
18  
19  
20  
21  
22  
23  
24  
25  
26  
27  
28  
29  
30  
31  
32  
33  
34  
35  
36  
37  
38  
39  
40  
41  
42  
43  
44  
45  
46  
47  
48  
49  
50  
51  
52  
53  
54  
55  
56  
57  
58  
59  
60

*always say an ounce of prevention in healthcare, and you know what, if you can catch things before they become too serious, or identify possible health outcomes through your interviews and through regular monitoring, then that would be really desirable, especially for the elderly (R-114).*

*Well, you've got a good location here because, first of all, you've got the doctors with all the information and you've got places to hold these [Healthy Aging] seminars (R-99 [MFP]).*

**The program may be relevant for different communities and populations**

*...it should be a program that's offered to a much wider scope of people... or even healthy people that are healthy at the moment (R-146).*

*I think that [Health TAPESTRY] could apply to people much younger who are confined to their homes (R-95).*

**Barriers to maintaining the program exist**

*I don't know how much publicity you have been able to use, but I think if everybody involved are aware of your services and there are things that you could bring to the table, I'm sure they wouldn't resist that. But my feeling is that...Maybe not enough people know about it (R-29).*

*...I think systematically it's [Health TAPESTRY] not sustainable because that's not how the system works...every time there's this big initiative to push toward prevention, it's with an eye on saving money, but then that cost usually does mean that some other program that's really needed is just not going to get funded...if you can't measure the dollars, you lose a lot of the buy-in (R-1)*

*Barriers would probably be people to work in the program. For example, the number of doctors and nurses, to have enough staff to continue the program (R-75).*

**DISCUSSION**

**Key Findings**

This study revealed that the Health TAPESTRY program was perceived by older adults as having many positive attributes (e.g. home visits, comprehensive assessments, and satisfaction with the team). However, most clients were not clear about the purpose of the program. Some

1  
2  
3 clients were unaware of how the program was meant to benefit them and thought that they were  
4 primarily helping the researchers by providing them with data. There were mixed findings  
5 related to the value of goal setting, with some clients finding it helpful for behaviour change and  
6 others finding it irrelevant or difficult. Participants also had mixed experiences with follow-up by  
7 the primary care team after volunteer visits. Some clients felt that there was a disconnect  
8 between the Health TAPESTRY program and the primary care clinic as they felt their  
9 information was either not given to or acted on by the primary care team. Other clients felt that  
10 Health TAPESTRY had actually sped up actions taken by the team as they were able to book  
11 earlier appointments with providers to discuss their health issue.  
12  
13  
14  
15  
16  
17  
18  
19  
20  
21  
22  
23

24 Using PHR technology was found to create numerous challenges and some clients  
25 preferred not to use the technology. Participants felt the program was sustainable and scalable  
26 but identified potential barriers to sustainability and scalability such as funding, staffing, and  
27 publicity. Although there were minor differences between site A and B in patient perceptions in  
28 four areas (i.e., clarity about the purpose of the program, perceptions related to whether the  
29 program resulted in little or no change in their life, enjoyment of home visits, and satisfaction  
30 with the primary care team and health system as a result of the program), given the lack of a  
31 clear pattern in the results, it is difficult to explain the reasons for these differences.  
32  
33  
34  
35  
36  
37  
38  
39  
40  
41

### 42 **Comparison with existing literature**

43  
44 Previous studies have similarly found that providing in-home visits by volunteers and  
45 peer mentors positively impacted the health and general well-being of older adults.<sup>29 30</sup> A home-  
46 based program targeting physical activity, nutrition, and social support conducted by trained  
47 nonprofessional volunteers has been found to improve the nutritional status of community-  
48 dwelling pre-frail and frail older adults and decrease the prevalence of frailty.<sup>30</sup> Peer volunteers  
49  
50  
51  
52  
53  
54  
55  
56  
57

1  
2  
3 who provide client support to learn self-management skills can increase physical activity among  
4  
5 older adults living in the community.<sup>29</sup> Community-dwelling older adults have been found to  
6  
7 have improved health outcomes with social support alone,<sup>30</sup> revealing that many older adults are  
8  
9 impacted by social isolation.<sup>31</sup> Health TAPESTRY clients felt that in-home visits by volunteers  
10  
11 encouraged social interaction and created awareness about their health. Volunteer support and  
12  
13 PHR technology has been known to have positive effects in improving health<sup>29 30</sup> and create  
14  
15 active client engagement in care.<sup>32</sup> In the current study however when combined, they provide a  
16  
17 link between clients living in their homes and communities and the primary care practices where  
18  
19 they receive healthcare.  
20  
21  
22  
23

24         Goal-setting has been shown to encourage shared decision-making between clients and  
25  
26 physicians<sup>33</sup> and improve outcomes associated with clinical interventions aimed at disease  
27  
28 prevention and maintaining function.<sup>34</sup> The current study revealed that there were mixed  
29  
30 experiences related to health goal-setting and receiving follow-up by providers. Although  
31  
32 typically found in mixed methods research, conflicting findings can also be found among  
33  
34 complex issues in social research.<sup>35</sup> Integrating differing views from participants can help  
35  
36 provide a complete description through a complementary approach.<sup>35</sup> Goal-setting in this current  
37  
38 study was seen as having varied benefits in improving health for older adults. This finding may  
39  
40 be related to differences in available social support systems. Saajanaho et al. (2016) found that  
41  
42 older adults with poor social resources were at a greater risk for having no health goals in their  
43  
44 lives compared to older adults with greater social support.<sup>36</sup> Goals focusing on maintaining  
45  
46 health were often made by older adults with good health resources while older adults with poor  
47  
48 resources typically made goals related to health recovery.<sup>36</sup>  
49  
50  
51  
52  
53  
54  
55  
56  
57  
58  
59  
60

1  
2  
3 Findings from the current study support previous evidence that interdisciplinary team-  
4 based primary care enhances quality of care for individuals, increase confidence and satisfaction  
5 with the healthcare system, and enhance client-centred practice.<sup>37</sup> Using this approach also helps  
6 older adults better connect with community support services (e.g. meal, transportation, and  
7 volunteer-visit services).<sup>38</sup> Many participants in the present study had multiple chronic  
8 conditions and findings provide support for an interprofessional team approach for community-  
9 dwelling older adults to provide ample time for clients to discuss their health needs and meet  
10 their needs through a single visit.<sup>3</sup> Health TAPESTRY was perceived as providing multiple  
11 opportunities to consult with various healthcare providers and provided in-home visits with  
12 volunteers who were interested in hearing clients' perspectives on health.  
13  
14  
15  
16  
17  
18  
19  
20  
21  
22  
23  
24  
25

26 Some challenges revealed in the current study were related to the limited uptake of  
27 technology and not seeing the added benefits of using PHR technology. The uptake of  
28 technology has been found to be influenced by multiple factors such as interest, competency, and  
29 usefulness. Older adults adopt technology when they feel that there is a need to do so and  
30 technology is perceived as user-friendly.<sup>39</sup> Older adults require more support in using technology  
31 to locate high quality evidence on the internet, access their health information, and explore the  
32 risks of privacy breaches online.<sup>40</sup>  
33  
34  
35  
36  
37  
38  
39  
40  
41

42 Participants in the current study identified barriers that need to be addressed to support  
43 sustainability and scalability of Health TAPESTRY. These included funding, human resources,  
44 and public awareness of the program to support recruitment. Similar barriers have been found in  
45 a review of public health interventions including intervention costs, inadequate human resources,  
46 staff recruitment and turnover, and inflexible funding structures unsupportive of scale-up.<sup>41</sup> A  
47 study that explored the perspectives of the Health TAPESTRY team on sustainability and  
48  
49  
50  
51  
52  
53  
54  
55  
56  
57  
58  
59  
60

1  
2  
3 scaling-up found that staffing resources (i.e. volunteers and providers) and funding capacities as  
4 well as attempting to gain the interest of stakeholders in the program were barriers to sustaining  
5 the program.<sup>42</sup> To overcome sustainability challenges, strategies such as embedding  
6 sustainability assessments as part of an implementation plan are needed to better anticipate and  
7 address barriers.  
8  
9

### 14 **Strengths and Limitations**

15  
16  
17 This study included participants with different health conditions and included a rigorous  
18 analytic method involving numerous experts in primary care, aging, evaluation, and qualitative  
19 research. It explored multiple facets of the program (e.g. goals, experiences, perceived impact,  
20 and sustainability and scalability). Other studies do not provide a comprehensive evaluation of  
21 primary care programs by exploring clients' perspectives.<sup>30 43 44</sup> They are often focused on  
22 quantitative outcome measures to determine effectiveness rather than perceived usefulness of  
23 programs by clients. Some limitations of the current study were a lack of cultural diversity  
24 among participants and the exclusion of non-English-speaking clients. Two practice sites within  
25 one area of Ontario representing one model of primary care, the family health team, limits  
26 transferability of results.  
27  
28  
29  
30  
31  
32  
33  
34  
35  
36  
37  
38  
39

### 40 **CONCLUSIONS**

41  
42 . Although the program was generally perceived as valuable as it incorporated  
43 comprehensive assessments, seminars, and an interdisciplinary approach, the purpose of Health  
44 TAPESTRY and how information was shared was unclear to most clients. Clients were unsure  
45 about the kind of benefits they could expect. The study revealed the need to explore client  
46 experiences to help modify and adapt primary care programs. Future research should include  
47 older adults as partners in shaping primary care programs. The purpose of research and programs  
48  
49  
50  
51  
52  
53  
54  
55  
56  
57

1  
2  
3 need to be clear for clients and their understanding of the aims of primary care programs should  
4  
5 be discussed at the start of an intervention. Researchers interested in testing interventions in  
6  
7 primary care should also consider implementing strategies for scaling-up programs in the early  
8  
9 phases of research, with active engagement of patients and other partners.  
10  
11  
12  
13  
14  
15  
16  
17  
18  
19  
20  
21  
22  
23  
24  
25  
26  
27  
28  
29  
30  
31  
32  
33  
34  
35  
36  
37  
38  
39  
40  
41  
42  
43  
44  
45  
46  
47  
48  
49  
50  
51  
52  
53  
54  
55  
56  
57

For peer review only

**Consent for publication**

Not applicable.

**Availability of data**

The data for this research consists of interview transcripts. We are unable to make raw data publicly available in order to respect the confidentiality of participants.

**Competing interests**

The authors declare no conflicts of interest with respect to the authorship and/or publication of this article.

**Funding**

This research was funded by a Health Canada Federal Innovations grant, the Ministry of Health and Long-term Care of Ontario, the Labarge Optimal Aging Initiative and the McMaster Family Health Organization.

**Authors' contributions**

RV conceptualized and led the study. LC, FP, and JG collected the data. RV and LC conducted the initial analysis, and subsequent analysis with FP and JG. JP and MY wrote the initial drafts of the paper. GA, DM, DO, CR, JG, LD, and MK contributed to validating the analysis, reviewing, and contributing to drafts. All authors read and approved the final manuscript.

**Acknowledgements**

We thank all of the study participants and our primary care partners for their contributions to this research. We thank Mehreen Bhamani for assistance with data collection and Nola Fuller for assistance with data collection and analysis. We also thank members of the stakeholder groups

1  
2  
3 who helped design Health TAPESTRY including patients, caregivers, healthcare providers,  
4  
5 volunteers, and community service agency staff.  
6  
7  
8  
9  
10  
11  
12  
13  
14  
15  
16  
17  
18  
19  
20  
21  
22  
23  
24  
25  
26  
27  
28  
29  
30  
31  
32  
33  
34  
35  
36  
37  
38  
39  
40  
41  
42  
43  
44  
45  
46  
47  
48  
49  
50  
51  
52  
53  
54  
55  
56  
57  
58  
59  
60

For peer review only

**REFERENCES**

1. Hutchison B, Glazier R. Ontario's primary care reforms have transformed the local care landscape, but a plan is needed for ongoing improvement. *Health Aff* 2013 Apr 1;32(4):695-703.
2. Boyd CM, Boult C, Shadmi E, *et al*. Guided care for multimorbid older adults. *Gerontologist* 2007 Oct 1;47(5):697-704.
3. Tracy CS, Bell SH, Nickell LA, *et al*. The IMPACT clinic: Innovative model of interprofessional primary care for elderly patients with complex health care needs. *Can Fam Physician* 2013 Mar 1;59(3):e148-55.
4. Shafir A, Garrigues SK, Schenker Y, *et al*. Homebound patient and caregiver perceptions of quality of care in home-based primary care: A qualitative study. *J Am Geriatr Soc* 2016 Aug 1;64(8):1622-7.
5. Berwick DM, Nolan TW, Whittington J. The triple aim: Care, health, and cost. *Health Aff* 2008 May;27(3):759-69.
6. Doyle C, Lennox L, Bell D. A systematic review of evidence on the links between patient experience and clinical safety and effectiveness. *BMJ Open* 2013 Jan 1;3:1-18.
7. Kuluski K, Nelson ML, Tracy CS, *et al*. Experience of care as a critical component of health system performance measurement: Recommendations for moving forward. *Healthc Pap* 2017 Oct;17(2):8-20.
8. Domecq JP, Prutsky G, Elraiyah T, *et al*. Patient engagement in research: a systematic review. *BMC Health Serv Res* 2014 Dec;14(89):1-9.
9. Sullivan P, Goldmann D. The promise of comparative effectiveness research. *JAMA* 2011; 305(4):400-1.

10. Franks P, Fiscella K. Primary care physicians and specialists as personal physicians. Health care expenditures and mortality experience. *J Fam Pract* 1998; 47(2): 105-9.
11. Starfield B. Primary care and health: A cross-national comparison. *JAMA* 1991; 266(16): 2268-71
12. Starfield B. Is primary care essential? *Lancet* 1994 Oct 22;344(8930):1129-33.
13. Starfield B, Shi L, Macinko J. Contribution of primary care to health systems and health. *Milbank Q* 2005; 83(3): 457-502.
14. Mangin D. The contribution of primary care research to improving health services. In: Goodyear-Smith F, Mash B, eds. *International Perspectives on Primary Care Research*. Boca Raton, FL: CRC Press; 2016:67-72.
15. Dolovich L, Oliver D, Lamarche L, *et al*. A protocol for a pragmatic randomized controlled trial using the Health Teams Advancing Patient Experience: Strengthening Quality (Health TAPESTRY) platform approach to promote person-focused primary healthcare for older adults. *Implement Sci* 2015 Dec;11(49):1-14.
16. Roy M, Levasseur M, Couturier Y, *et al*. The relevance of positive approaches to health for patient-centered care medicine. *Prev Med Rep* 2015 Jan 1;2:10-2.
17. Javadi D, Lamarche L, Avilla E, *et al*. Feasibility study of goal setting discussions between older adults and volunteers facilitated by an eHealth application: Development of the Health TAPESTRY approach. *Pilot Feasibility Stud* 2018 Dec;4(184):1-13.
18. Oliver D, Dolovich L, Lamarche L, *et al*. A volunteer program to connect primary care and the home to support the health of older adults: A community case study. *Front Med* 2018 Feb 26;5(48):1-6.

- 1  
2  
3 19. Lamarche L, Oliver D, Cleghorn L, *et al*. Using aggregate data on health goals, not  
4  
5 disease diagnoses, to develop and implement a healthy aging group education series. *J*  
6  
7 *Community Med Health Educ* 2017;7:4:1-7.  
8  
9
- 10 20. Sandelowski M. Focus on research methods-whatever happened to qualitative  
11  
12 description? *Res Nurs Health* 2000 Aug;23(4):334-40.  
13
- 14 21. Sandelowski M. What's in a name? Qualitative description revisited. *Res Nurs Health*  
15  
16 2010 Feb 1;33(1):77-84.  
17
- 18 22. NVivo qualitative data analysis Software; QSR International Pty Ltd. Version 10, 2012.  
19
- 20 23. Bryman A. *Social Research Methods*. 5th ed. Oxford, UK: Oxford University Press;  
21  
22 2016.  
23
- 24 24. Sandelowski M. Real qualitative researchers do not count: the use of numbers in  
25  
26 qualitative research. *Res Nurs Health* 2001 Jun;24(3):230-40.  
27
- 28 25. Tong A, Sainsbury P, Craig J. Consolidated criteria for reporting qualitative research  
29  
30 (COREQ): A 32-item checklist for interviews and focus groups. *Int J Qual Health Care*  
31  
32 2007;19(6):349-357.  
33
- 34 26. Lincoln YS, Guba EG. *Naturalistic inquiry*. Sage Publications, 1985.  
35
- 36 27. Creswell JW. *Qualitative inquiry and research design: Choosing among five approaches*.  
37  
38 3<sup>rd</sup> ed. Thousands Oak, CA: Sage Publications, 2013.  
39
- 40 28. Valaitis R, Longaphy J, Nair K, *et al*. Persona-scenario exercise for codesigning primary  
41  
42 care interventions. *Can Fam Physician*. 2014 Mar 1;60(3):294-6.  
43
- 44 29. Buman MP, Giacobbi PR Jr, Dzierzewski JM, *et al*. Peer volunteers improve long-term  
45  
46 maintenance of physical activity with older adults: A randomized controlled trial. *J Phys*  
47  
48 *Act Health* 2011; September;8(Suppl 2): S257–66.  
49  
50  
51  
52  
53  
54  
55

- 1  
2  
3 30. Luger E, Dorner TE, Haider S, *et al.* Effects of a home-based and volunteer-administered  
4 physical training, nutritional, and social support program on malnutrition and frailty in  
5 older persons: A randomized controlled trial. *J Am Med Dir Assoc* 2016 Jul 1;17(7):671-  
6 9.  
7  
8  
9  
10  
11  
12 31. Smith SG, Jackson SE, Kobayashi LC, *et al.* Social isolation, health literacy, and  
13 mortality risk: Findings from the English Longitudinal Study of Ageing. *Health Psychol*  
14 2018 Feb;37(2):160-9.  
15  
16  
17  
18  
19 32. Krist AH, Woolf SH, Bello GA, *et al.* Engaging primary care patients to use a patient-  
20 centered personal health record. *Ann Fam Med* 2014 Sep 1;12(5):418-26.  
21  
22  
23  
24 33. Naik AD, Schulman-Green D, McCorkle R, *et al.* Will older persons and their clinicians  
25 use a shared decision-making instrument? *J Gen Intern Med* 2005 Jul 1;20(7):640-3.  
26  
27  
28  
29 34. Schulman-Green DJ, Naik AD, Bradley EH, *et al.* Goal setting as a shared decision  
30 making strategy among clinicians and their older patients. *Patient Educ Couns* 2006 Oct  
31 1;63(1-2):145-51.  
32  
33  
34  
35 35. Slonim-Nevo V, Nevo I. Conflicting findings in mixed methods research: An illustration  
36 from an Israeli study on immigration. *J Mix Methods Res* 2009 Apr;3(2):109-28.  
37  
38  
39  
40 36. Saajanaho M, Rantakokko M, Portegijs E, *et al.* Life resources and personal goals in old  
41 age. *Eur J Ageing* 2016 Sep 1;13(3):195-208.  
42  
43  
44  
45 37. Jesmin S, Thind A, Sarma S. Does team-based primary health care improve patients'  
46 perception of outcomes? Evidence from the 2007–08 Canadian Survey of Experiences  
47 with Primary Health. *Health Policy* 2012 Apr 1;105(1):71-83.  
48  
49  
50  
51  
52  
53  
54  
55  
56  
57  
58  
59  
60

- 1  
2  
3 38. Ploeg J, Denton M, Hutchison B, *et al.* Primary health care providers' perspectives:  
4  
5 Facilitating older patients' access to community support services. *Can J Aging* 2016  
6  
7 Dec;35(4):499-512.  
8  
9  
10 39. Hanson VL. Influencing technology adoption by older adults. *Interact Comput* 2010 Sep  
11  
12 21;22(6):502-9.  
13  
14 40. Ware P, Bartlett SJ, Paré G, *et al.* Using eHealth technologies: Interests, preferences, and  
15  
16 concerns of older adults. *Interact J Med Res* 2017 Jan;6(1):1-16.  
17  
18  
19 41. Milat AJ, Bauman A, Redman S. Narrative review of models and success factors for  
20  
21 scaling up public health interventions. *Implement Sci* 2015 Dec;10(113):1-11.  
22  
23  
24 42. Kastner M, Sayal R, Oliver D, *et al.* Sustainability and scalability of a volunteer-based  
25  
26 primary care intervention (Health TAPESTRY): A mixed-methods analysis. *BMC Health*  
27  
28 *Serv Res* 2017 Dec;17(514):1-21.  
29  
30  
31 43. Counsell SR, Callahan CM, Clark DO, *et al.* Geriatric care management for low-income  
32  
33 seniors: A randomized controlled trial. *Jama* 2007 Dec 12;298(22):2623-33.  
34  
35  
36 44. Huss A, Stuck AE, Rubenstein LZ, *et al.* Multidimensional preventive home visit  
37  
38 programs for community-dwelling older adults: A systematic review and meta-analysis of  
39  
40 randomized controlled trials. *J Gerontol A Biol Sci Med Sci* 2008 Mar 1;63(3):298-307.  
41  
42  
43  
44  
45  
46  
47  
48  
49  
50  
51  
52  
53  
54  
55  
56  
57  
58  
59  
60

**Manuscript:** Perceptions of Older Adults on the Implementation and Impact of a Primary Care Program, Health Teams Advancing Patient Experience: Strengthening Quality (Health TAPESTRY): A Descriptive Qualitative Study

### Consolidated criteria for reporting qualitative studies (COREQ): 32-item checklist

Developed from:

Tong A, Sainsbury P, Craig J. Consolidated criteria for reporting qualitative research (COREQ): A 32-item checklist for interviews and focus groups. *Int J Qual Health Care* 2007;19(6):349-357.

| Topic                                          | Item No. | Guide Questions/Descriptions                                                                                                                               | Reported on Page No. |
|------------------------------------------------|----------|------------------------------------------------------------------------------------------------------------------------------------------------------------|----------------------|
| <b>Domain 1: Research team and reflexivity</b> |          |                                                                                                                                                            |                      |
| <i>Personal characteristics</i>                |          |                                                                                                                                                            |                      |
| Interviewer/Facilitator                        | 1        | Which authors conducted the interview or focus group?                                                                                                      | P. 9                 |
| Credentials                                    | 2        | What were the researchers' credentials? (e.g. PhD, MD, MSc)                                                                                                | P. 1                 |
| Occupation                                     | 3        | What were the researchers' occupation at the time of the study?                                                                                            | P. 1                 |
| Gender                                         | 4        | Were the researchers male or female?                                                                                                                       | P. 1                 |
| Experience and training                        | 5        | What experience or training did the researchers have?                                                                                                      | P. 11                |
| <i>Relationship with participants</i>          |          |                                                                                                                                                            |                      |
| Relationship established                       | 6        | Was a relationship established prior to study commencement?                                                                                                | P. 8                 |
| Participant knowledge of the interviewers      | 7        | What did the participants know about the researchers? (e.g. personal goals, reasons for doing the research)                                                | P. 8-11              |
| Interviewer characteristics                    | 8        | What characteristics were reported about the interviewers? (e.g. Bias, assumptions, reasons and interests in the research topic)                           | N/A                  |
| <b>Domain 2: Study design</b>                  |          |                                                                                                                                                            |                      |
| <i>Theoretical framework</i>                   |          |                                                                                                                                                            |                      |
| Methodological orientation and Theory          | 9        | What methodological orientation was stated to underpin the study? (e.g. grounded theory, discourse analysis, ethnography, phenomenology, content analysis) | P. 7                 |
| <i>Participant selection</i>                   |          |                                                                                                                                                            |                      |

|    |                                        |    |                                                                                      |
|----|----------------------------------------|----|--------------------------------------------------------------------------------------|
| 1  |                                        |    |                                                                                      |
| 2  |                                        |    |                                                                                      |
| 3  |                                        |    |                                                                                      |
| 4  | Sampling                               | 10 | How were participants selected? (e.g. purposive, convenience, consecutive, snowball) |
| 5  |                                        |    |                                                                                      |
| 6  |                                        |    |                                                                                      |
| 7  | Method of approach                     | 11 | How were participants approached? (e.g. face-to-face, telephone, mail, email)        |
| 8  |                                        |    |                                                                                      |
| 9  |                                        |    |                                                                                      |
| 10 |                                        |    |                                                                                      |
| 11 | Sample size                            | 12 | How many participants were in the study?                                             |
| 12 |                                        |    |                                                                                      |
| 13 | Non-participation                      | 13 | How many people refused to participate or dropped out? Reasons?                      |
| 14 |                                        |    |                                                                                      |
| 15 |                                        |    |                                                                                      |
| 16 | <i>Setting</i>                         |    |                                                                                      |
| 17 | Setting of data collection             | 14 | Where was the data collected? (e.g. home, clinic, workplace)                         |
| 18 |                                        |    |                                                                                      |
| 19 | Presence of non-participants           | 15 | Was anyone else present besides the participants and researchers?                    |
| 20 |                                        |    |                                                                                      |
| 21 | Description of sample                  | 16 | What are the important characteristics of the sample? (e.g. demographic data, date)  |
| 22 |                                        |    |                                                                                      |
| 23 |                                        |    |                                                                                      |
| 24 |                                        |    |                                                                                      |
| 25 |                                        |    |                                                                                      |
| 26 | <i>Data collection</i>                 |    |                                                                                      |
| 27 | Interview guide                        | 17 | Were questions, prompts, guides provided by the authors? Was it pilot tested?        |
| 28 |                                        |    |                                                                                      |
| 29 |                                        |    |                                                                                      |
| 30 |                                        |    |                                                                                      |
| 31 | Repeat interviews                      | 18 | Were repeat inter views carried out? If yes, how many?                               |
| 32 |                                        |    |                                                                                      |
| 33 | Audio/visual recording                 | 19 | Did the research use audio or visual recording to collect the data?                  |
| 34 |                                        |    |                                                                                      |
| 35 | Field notes                            | 20 | Were field notes made during and/or after the interview or focus group?              |
| 36 |                                        |    |                                                                                      |
| 37 |                                        |    |                                                                                      |
| 38 | Duration                               | 21 | What was the duration of the interviews or focus group?                              |
| 39 |                                        |    |                                                                                      |
| 40 |                                        |    |                                                                                      |
| 41 | Data saturation                        | 22 | Was data saturation discussed?                                                       |
| 42 |                                        |    |                                                                                      |
| 43 | Transcripts returned                   | 23 | Were transcripts returned to participants for comment and/or correction?             |
| 44 |                                        |    |                                                                                      |
| 45 |                                        |    |                                                                                      |
| 46 | <b>Domain 3: analysis and findings</b> |    |                                                                                      |
| 47 | <i>Data analysis</i>                   |    |                                                                                      |
| 48 |                                        |    |                                                                                      |
| 49 | Number of data coders                  | 24 | How many data coders coded the data?                                                 |
| 50 |                                        |    |                                                                                      |
| 51 | Description of the coding tree         | 25 | Did authors provide a description of the coding tree?                                |
| 52 |                                        |    |                                                                                      |
| 53 | Derivation of themes                   | 26 | Were themes identified in advance or derived from the data?                          |
| 54 |                                        |    |                                                                                      |
| 55 |                                        |    |                                                                                      |
| 56 |                                        |    |                                                                                      |
| 57 |                                        |    |                                                                                      |
| 58 |                                        |    |                                                                                      |
| 59 |                                        |    |                                                                                      |
| 60 |                                        |    |                                                                                      |

|                              |    |                                                                                                                                   |          |
|------------------------------|----|-----------------------------------------------------------------------------------------------------------------------------------|----------|
| Software                     | 27 | What software, if applicable, was used to manage the data?                                                                        | P. 10    |
| Participant checking         | 28 | Did participants provide feedback on the findings?                                                                                | N/A      |
| <i>Reporting</i>             |    |                                                                                                                                   |          |
| Quotations presented         | 29 | Were participant quotations presented to illustrate the themes/findings? Was each quotation identified? (e.g. participant number) | P. 13-23 |
| Data and findings consistent | 30 | Was there consistency between the data presented and the findings?                                                                | P. 13-23 |
| Clarity of major themes      | 31 | Were major themes clearly presented in the findings?                                                                              | P. 13-23 |
| Clarity of minor themes      | 32 | Is there a description of diverse cases or discussion of minor themes?                                                            | P. 13-23 |
